# Supplementary material for: Prediction of yield and quality in medicinal plant Ligusticum chuanxiong Hort. using uncrewed aerial vehicle multispectral measurement
Source: PeerJ. 2025 Apr 7;13:e19264. doi: 10.7717/peerj.19264 (PMC11984469; doi:10.7717/peerj.19264)
Supplement: Supplemental Information 1 [file peerj-13-19264-s001.xls]

## Sheet: Yield
Area	Number	Freesh Weight(g)			Dry Weight(g)
		1	2	3	1	2	3
Aoping	1-1	71.9	75.37	134.693	48.54	48.58	19.775
	1-2	111.21	120.85	70.625	41.46	28.58	58.0075
	1-3	77.04	52.99	90.3425	38.43	22.4	29.14
	2-1	71.69	77.47	80.5275	38.53	35.04	9.4775
	2-2	85.3	78.48	61.7225	36.07	19.28	43.89
	2-3	81.94	83.56	45.49	28.6	20.82	39.74
	3-1	56.89	101.18	58.6875	45.08	19.11	44.11
	3-2	58.7	81.6	82.3225	28.36	39.06	27.0725
	3-3	69.2	102.59	53.015	27.3	22.99	39.53
	4-1	41.57	94.32	110.493	43.24	39.83	22.8
	4-2	55.18	56.49	101.15	22.09	43.91	20.745
	4-3	67.11	87.49	82.7525	33.47	40.08	27.9925
	1'-3	105.14	113.25	84.805	42.68	45.15	30.4825
	1'-1	64.74	73.93	91.9625	43.14	36.95	49.9675
	1'-2	112.79	84.43	100.335	26.72	27	36.2875
	2'-2	81.61	65.47	52.0225	24.79	26.57	33.27
	2'-1	41.52	26.85	99.5775	31	10.53	28.445
	2'-3	48.7	43.64	136.2	61.1	17.88	16.225
	3'-1	31.57	40.93	77.3125	16.19	17.11	26.145
	3'-2	48.93	43.2	66.84	26.91	9.64	18.935
	3'-3	50.65	100.51	67.495	21.06	27.85	39.305
	4'-2	94.08	105.94	43.625	33.75	34.91	32.7325
	4'-1	60.41	90.84	55.3225	31.86	21.85	34.8425
	4'-3	57.34	63.75	73.415	30.17	28.84	26.145
Shiyang	1-1	38.76	16.08	14.23	4.25	5.53	13.91
	1-2	41.03	64.63	59.86	15.51	22.08	17.26
	1-3	48.24	9.2	20.85	2.98	1.85	14.2275
	2-1	31.79	35.71	11.32	10.08	11.65	3.49
	2-2	29.96	46.85	15.5	13.5	7.07	4.47
	2-3	17.86	17.73	12.04	3.87	5.18	5.46
	3-1	36.58	32.62	31.25	10.02	9.38	10.19
	3-2	35.05	29.19	24.53	7.47	10	11.4
	3-3	37.13	30.99	12.72	3.24	9.75	9.96
	4-1	32.69	36.12	18.98	9.15	11.97	5.63
	4-2	15.38	45.95	24.66	3.71	7.47	10.62
	4-3	25.92	12.35	20.5	7.44	5.34	4.34
	5-1	20.54	20.49	49.7275	4.86	9.09	9.81
	5-2	32.16	8.3	89.455	29.14	20.51	12.2
	5-3	17.85	16.39	8.4	5.12	1.38	4.98
	6-1	56.4	55	18.2	5.07	20.76	18.64
	6-2	24.89	45.67	23.7	7.45	5.66	6.9
	6-3	19.14	29.13	33.52	5.92	9.42	8.58
	7-1	36.74	45.75	21.01	15.04	11.69	7.01
	7-2	12.32	12.74	56.1275	3.16	20.51	2.085
	7-3	15.3	13.67	23.43	4.43	6.5	4.36
	8-1	49.13	59.09	30.53	10.38	16.73	21.49
	8-2	19.39	49.85	48.73	17.74	17.15	5.93
	8-3	17.4	28.06	9.46	2.25	8.61	4.96
	9-1	49.77	59.68	55.93	11.83	18.43	17.27
	9-2	20.55	39.11	48.02	16.61	13.55	7.05
	9-3	15.74	16.22	63.22	5.11	21.72	5
	10-1	14.12	69.26	45.42	15.86	24.17	4.05
	10-2	36.64	26.41	23.23	7.75	12.48	7.88
	10-3	32.08	18.48	38.97	5.85	10.5	13.61
	11-1	18.28	49.9	8.02	2.58	5.81	13.59
	11-2	44.02	28.2	30.9	9.07	12.95	9
	11-3	24.39	45.28	56.54	6.76	15.02	18.3
	12-1	32.58	59.96	23.69	5.34	11.39	15.15
	12-2	42.9	65.1	10.87	3.16	14.96	20.9
	12-3	31.69	26.85	43.57	9.56	12.96	7.22
	1-1	32.38	32.39	16.37	10.77	10.43	5.52
	1-2	34.24	12.26	67.2675	12.47	13.38	15.3175
	1-3	22.7	28.53	22.03	8.04	7.17	9.43
	1-4	58.46	70.5	41.03	23.31	19.68	9.41
	1-5	53.59	11.83	15.745	8.08	4.15	14.74
	1-6	65.95	55.65	61.29	16.81	23.56	21.53
	1-7	14.18	92.83	81.17	27.52	33.32	4.2
	1-8	35.8	90.56	91.75	33.06	12.24	32.37
	1-9	39		175.095	36.49		9.92
	1-10	73.73	57.6	67.8475	12.09	27.77	23.23
	1-11	62.08	49.76	119.97	19.63	37.58	17.41
	1-12	122.86	17.62	50.344	11.69	11.01	43.45
	1-13	20.71	33.54	51.79	11.22	6.52	15.42
	1-14	66.1	68.08	93.41	33.95	23.04	24.65
	2-1	55.25		63.985			59.04
	2-2	34.02	79.52	56.67	29.06	17.71	11.79
	2-3	95.58	28.74	30.36	8.7	38.75	10.79
	2-4	89.51		136.735	19.41		29.07
	2-5	38.55	9.98	2.77	14.06	0.68	3.18
	2-6	60.47	48.08	11.85	22.05	16.56	3.98
	2-7	24.67	36.64	6.1	2.31	15.49	9.96
	2-8	16.81	22.43	48.51	5.66	18.84	8.05
	2-9	22.01	33.8	41.435	19.83	12.05	3.625
	2-10	62.07	13.67	10.22	3.14	4.69	23.3
	2-11	92.79	17.45	92.23	29.89	34.64	5.96
	2-12	43.25	44.43	38.69	15.91	15.62	13.41
	2-13	63.21	115.13	44.84	22.98	34.7	16.89
	2-14	68.27	37.57	73.87	13.14	27	25.18
	2-15	86.3	50.82	32.17	31.5	17.42	8.26
	2-16	48.13	58.55	118.67	19.37	41.89	16.28
	2-17	99.54	56.36	49.15	32.69	21.66	12.12
	2-18	54.53	98.62	80.29	25.34	36.66	16.04
	1-1	86.28	89.24	61.44	31.83	31.68	23.86
	1-2	68.74	68.11	91.41	20.15	33.96	27.42
	1-3	101.3	108.51	58.43	19.07	32.8	35.76
	1-4	38.09	82.45	48.8	13.79	27.5	17.99
	1-5	39.36	94.55	75.76	15.07	36.18	30.97
	1-6	104.25	114.89	93.74	43.18	34.7	32.02
	2-1	81.54	53.03	92.85	29.8	30.16	17.06
	2-2	79.18	120.67	83.04	29.11	42.29	24.99
	2-3	52.37	75.28	62.37	19.97	23.59	27.85
	2-4	92.63	63.4	48.47	20.72	34.51	18.14
	2-5	106.94	75.89	80.31	25.52	30.66	38.69
	2-6	88.49	89.94	89.55	31.96	34.94	31.42
	3-1	88.05	131.86	76.05	25.59	46	36.27
	3-2	68.4	91.18	85.07	32.77	24.92	32.62
	3-3	126.35	96.85	96.75	36.13	45.39	37.84
	3-4	76.17	113.85	91.87	41.66	30.49	34.59
	3-5	49.48	65.92	82.17	17.75	30.13	23.56
	3-6	20.33	44.87	72.8125	6.53	46.09	25.5825
	4-1	62.18	45.07	39.43	21.78	16.35	14.38
	4-2	51.65	82.34	47.78	17.44	18.38	28.94
	4-3	66.45	82.75	98.34	27.64	30.43	22.34
	4-4	67.11	55.45	75.38	21.07	28.76	23.07
	4-5	83.56	65.09	110.69	22.22	31.65	40.39
	4-6	61.78	103.65	53.18	38.11	19.65	20.44
	5-1	29.46	44.21	79.14	9.98	29.75	15.57
	5-2	75.5	39.66	90.98	32.49	12.48	26.46
	5-3	77.46	108.75	57.67	24.78	36.32	19.51
	5-4	113.19	61.27	143.21	42.63	52.64	23.69
	5-5	107.06	99.86	62.91	36.49	36.31	24.19
	5-6	161.14	125.02	71.43	27.92	47.76	59.71
	6-1	59.69	89.55	30.2	29.47	9.76	21.05
	6-2	62.47	39.68	110.42	23.68	37.15	13.01
	6-3	122.56	92.08	66.34	32.47	45.97	22.51
	6-4	78.41	68.45	73.47	21.77	25.77	25.23
	6-5	50.76	59.25	76.74	21.32	18.95	28.49
	1-1	116.92	13.05	107.68	38.47	38.52	4.29
	1-2	110.84	44.41	74.95	39.76	23.74	14.73
	1-3	91.71	16.9	96.83	30.46	34.05	5.02
	1-4	24.7	22.75	49.46	7.01	6.84	16.06
	2-1	40.69	49.13	65.17	16.62	9.64	20.36
	2-2	79.37	107.3	112.56	25.93	38.25	37.15
	2-3	75.78	109.03	35.28	38.58	25.68	7.24
	2-4	70.39	91.24	26.5825	30.18	24.06	8.145
	3-1	93.08	89.11	75.83	28.62	33.71	27.75
	3-2	141.03	116.67	55.93	53.65	35.72	18.88
	3-3	44.86	121.06	109.72	40.37	41.39	13.21
	3-4	92.4	86.27	85.2	33.34	27.65	32.09
	3-5	78.79	62.67	86.29	30.43	28.11	22.51
	3-6	70.47	84.73	66.1	29.18	22.14	15.99
	4-1	60.93	13.97	81.92	19.45	4.52	28.12
	4-2	37.07	187.87	43.61	3.34	2.87	58.545
	4-3	28.31	49.04	90.43	3.68	4.1	30.26
	4-4	53.6	29.56	113.93	19.32	44.28	6.91
	4-5	153.38	29.67	134.39	48.48	57.28	10.66
	4-6	37.06	98.78	117.27	44.29	31.59	13.17
	1-0	109.9	75.25	35.77	27.9	39.95	13.33
	2-0	82.8	92.77	82.47	32.35	29.46	29.19

## Sheet: Quality
Area	Number	The peak area of ferulic acid			The peak area of Z-ligustilide			The peak area of senkyunolide A
		1	2	3	1	2	3	1	2	3
Aoping	1-1	2.242	2.258	2.257	15.029	15.074	15.022	2.854	2.887	2.812
	1-2	2.281	2.282	2.29	15.575	15.559	15.527	2.774	2.772	2.777
	1-3	2.664	2.678	2.674	16.219	16.838	16.805	2.99	3.002	2.901
	2-1	2.629	2.588	2.627	15.082	15.032	15.072	2.814	2.753	2.812
	2-2	2.325	2.321	2.349	12.204	12.167	12.222	1.764	1.752	1.777
	2-3	2.1835	2.1883	2.1939	18.4671	18.4245	18.4357	2.6746	2.6815	2.6773
	3-1	1.94	1.907	1.823	18.102	18.088	18.135	3.238	3.237	3.267
	3-2	2.553	2.551	2.562	17.998	18.021	17.997	3.073	3.079	3.084
	3-3	1.844	1.842	1.775	19.872	19.94	19.835	2.907	2.936	2.921
	4-1	2.167	2.223	2.178	14.512	14.504	14.468	2.928	2.956	2.919
	4-2	2.578	2.573	2.586	18.209	18.177	18.207	3.185	3.199	3.182
	4-3	2.285	2.269	2.309	9.623	9.677	9.658	1.754	1.742	1.752
	1'-3	1.49	1.478	1.489	13.691	13.718	13.662	2.224	2.239	2.228
	1'-1	2.5	2.483	2.503	14.926	14.877	14.909	2.594	2.5992	2.601
	1'-2	2.591	2.588	2.571	15.245	15.252	15.187	2.52	2.532	2.518
	2'-2	2.688	2.701	2.696	15.136	15.217	15.171	3.112	3.055	3.079
	2'-1	2.574	2.587	2.644	19.536	19.666	19.524	4.255	4.281	4.248
	2'-3	2.33	2.312	2.338	17.53	17.435	17.488	3.526	3.506	3.522
	3'-1	2.32	2.322	2.302	12.004	12.02	12.037	2.175	2.185	2.171
	3'-2	3.088	3.062	3.103	11.004	10.933	10.995	1.868	1.903	1.9
	3'-3	2.432	2.424	2.422	15.862	15.754	15.854	3.043	3.031	3.056
	4'-2	2.413	2.4	2.382	11.033	10.982	11.02	1.846	1.839	1.843
	4'-1	2.022	2.009	2.018	15.345	15.307	15.383	2.787	2.792	2.779
	4'-3	2.632	2.634	2.741	18.034	18.007	17.959	3.283	3.295	3.329
Shiyang	1-1	2.278	2.309	2.315	11.523	11.735	11.706	2.25	2.303	2.311
	1-2	2.995	2.982	2.982	11.841	11.833	11.829	2.469	2.461	2.46
	1-3	4.366	4.311	4.362	2.871	2.858	2.872	0.806	0.807	0.823
	2-1	1.906	1.989	1.911	12.836	12.899	12.895	4.174	4.144	4.165
	2-2	2.051	2.03	2.059	13.722	13.668	13.742	2.707	2.784	2.791
	2-3	1.724	1.785	1.806	8.761	9.178	9.191	1.678	1.681	1.603
	3-1	2.273	2.209	2.198	13.183	13.352	13.684	2.505	2.534	2.611
	3-2	2.792	2.694	2.689	11.439	11.759	12.083	2.33	2.249	2.403
	3-3	2.692	2.676	2.74	13.176	13.113	13.226	2.582	2.565	2.588
	4-1	2.797	2.757	2.769	5.444	5.412	5.412	1.303	1.288	1.293
	4-2	2.656	2.579	2.678	10.039	9.989	10.023	2.174	2.163	2.167
	4-3	3.341	3.517	3.51	11.27	11.78	11.824	2.057	2.167	2.156
	5-1	2.008	1.95	2	8.492	8.513	8.645	2.366	2.33	2.358
	5-2	3.695	3.717	3.718	11.872	12.011	11.957	2.895	2.898	2.866
	5-3	4.623	4.65	4.7	12.754	12.587	12.562	2.366	2.352	2.311
	6-1	1.682	1.702	1.695	11.758	11.98	11.909	2.433	2.546	2.516
	6-2	2.219	2.225	2.195	5.566	5.57	5.544	1.217	1.219	1.212
	6-3	3.443	3.345	3.475	15.802	15.638	15.762	3.234	3.18	3.109
	7-1	2.897	2.87	2.904	15.065	14.99	15.059	3.24	3.226	3.244
	7-2	3.121	3.097	3.102	15.187	15.206	15.269	3.246	3.223	3.236
	7-3	2.679	2.596	2.664	10.334	10.122	10.293	2.827	2.851	2.827
	8-1	4.658	4.706	4.625	10.538	10.762	10.636	2.365	2.396	2.38
	8-2	3.571	3.748	3.733	11.857	11.922	11.386	3.817	3.814	3.639
	8-3	3.149	3.034	3.16	10.613	9.966	10.333	2.392	2.259	2.298
	9-1	4.948	4.901	4.901	16.758	16.887	17.043	4.001	3.96	4.011
	9-2	4.075	4.056	3.963	13.48	13.702	13.88	2.731	2.795	2.809
	9-3	2.595	2.539	2.559	10.646	10.597	10.581	2.343	2.337	2.359
	10-1	2.309	2.27	2.402	8.499	8.593	8.602	2.436	2.435	2.443
	10-2	2.143	2.146	2.191	11.441	11.228	11.478	2.255	2.201	2.288
	10-3	2.094	2.347	2.079	11.76	11.758	11.795	3.567	3.576	3.607
	11-1	3.583	3.603	3.583	12.862	12.792	12.722	2.679	2.679	2.672
	11-2	2.63	2.581	2.586	9.768	9.735	9.749	2.404	2.301	2.295
	11-3	3.68	3.607	3.699	17.306	17.155	17.212	3.877	3.848	3.855
	12-1	3.117	3.097	3.127	11.141	11.018	11.109	3.013	2.967	3.105
	12-2	4.876	4.223	4.188	15.364	14.952	14.722	3.59	3.413	3.462
	12-3	3.296	3.255	3.353	17.094	17.133	17.127	2.95	2.946	2.935
	1-1	3.956	3.995	3.997	14.026	14.066	14.138	4.344	4.336	4.286
	b1-2	1.602	1.604	1.584	7.073	8.622	8.591	1.692	1.707	1.705
	1-2	3.609	3.552	3.626	14.6	14.51	14.62	4.254	4.266	4.254
	1-3’	3.542	3.545	3.534	18.235	18.23	18.135	5.233	5.259	5.253
	1-4	3.952	3.879	3.792	12.083	12.132	12.63	4.18	4.041	3.984
	1-5	3.956	3.911	3.968	14.007	14.006	14.103	3.599	3.587	3.574
	1-6	3.862	3.85	3.846	18.538	18.566	18.399	5.146	5.194	5.189
	1-7	3.587	3.518	3.551	16.76	16.58	16.683	4.57	4.546	4.598
	1-8	3.732	3.536	3.61	8.477	8.37	8.784	2.155	2.062	2.083
	1-9	2.697	2.697	2.706	10.98	11.023	10.931	3.439	3.413	3.447
	1-10	3.417	3.453	3.414	14.169	14.177	14.131	4.609	4.636	4.621
	1-11	4.542	4.516	4.548	15.137	15.062	15.067	4.338	4.33	4.349
	1-12	3.273	3.303	3.281	14.559	14.736	14.606	3.844	3.885	3.83
	1-13	4.445	4.585	4.283	10.341	10.679	9.94	4.9	4.923	4.896
	1-14	3.922	3.938	3.952	16.06	14.165	14.068	3.488	3.749	3.647
	2-1	3.67	3.677	3.653	15.44	15.536	15.466	4.185	4.147	4.146
	2-2	4.821	4.816	4.824	16.74	16.698	16.743	5.734	5.712	5.742
	2-3	2.283	2.274	2.288	15.477	15.437	15.498	4.246	4.238	4.248
	2-4	3.146	3.141	3.144	12.435	12.481	12.408	4.066	4.077	4.055
	2-5	2.718	2.703	2.713	13.56	13.53	13.635	4.069	4.037	4.048
	2-6	2.994	2.988	3.009	14.366	14.334	14.311	4.254	4.278	4.28
	2-7	3.201	3.155	3.232	16.084	16.028	16.004	4.513	4.512	4.545
	2-8	2.233	2.253	2.241	15.455	15.481	15.294	4.183	4.22	4.211
	2-9	2.266	2.263	2.27	12.562	12.562	12.557	3.427	3.415	3.436
	2-10	2.496	2.475	2.516	14.936	14.819	14.935	4.554	4.51	4.547
	2-11	2.786	2.793	2.777	9.3	9.349	9.329	2.613	2.61	2.601
	2-12	3.678	3.694	3.695	13.391	13.468	13.46	4.287	4.323	4.258
	2-13	3.005	2.976	3.014	13.341	13.329	13.437	4.179	4.148	4.151
	2-14	3.653	3.605	3.654	16.316	16.4	16.468	4.662	4.665	4.635
	2-15	3.527	3.529	3.468	15.215	15.316	15.078	4.701	4.819	4.707
	2-16	3.611	3.621	3.621	16.261	16.636	16.312	4.825	4.879	4.843
	2-17	2.612	2.604	2.612	13.886	13.861	13.872	4.017	4.01	4.022
	2-18	3.313	3.296	3.315	11.511	11.5	11.509	3.433	3.437	3.442
	1-1	3.308	3.3	3.306	17.758	17.732	17.685	3.831	3.786	3.802
	1-2	2.81	2.806	2.792	18.31	18.304	18.351	3.236	3.242	3.238
	1-3	1.985	1.99	2.001	13.983	13.947	13.905	2.301	2.305	2.317
	1-4	3.118	3.069	3.115	20.393	20.285	20.432	3.519	3.547	3.542
	1-5	3.377	3.347	3.383	17.233	17.207	17.195	3.048	3.063	3.044
	1-6	2.872	2.874	2.884	11.332	11.302	11.293	2.282	2.265	2.271
	2-1	2.881	2.868	2.868	17.007	16.976	16.988	3.541	3.536	3.538
	2-2	3.632	3.604	3.62	17.569	17.513	17.651	3.547	3.532	3.568
	2-3	2.652	2.655	2.658	15.796	15.857	15.722	3.068	3.036	3.057
	2-4	3.509	3.461	3.497	21.085	21.056	21.283	4.019	4.001	4.048
	2-5	2.769	2.755	2.741	8.885	8.797	8.785	1.952	1.96	1.96
	2-6	3.015	3.007	3.019	11.502	11.51	11.423	2.199	2.204	2.185
	3-1	3.055	3.041	3.076	16.188	16.025	16.287	2.858	2.829	2.861
	3-2	2.246	2.213	2.223	15.614	15.73	15.774	2.667	2.687	2.691
	3-3	2.954	2.975	2.956	17.968	18.064	17.798	3.636	3.656	3.634
	3-4	2.388	2.352	2.371	13.734	13.684	13.79	2.356	2.348	2.369
	3-5	3.31	3.285	3.295	20.649	20.591	20.716	3.594	3.717	3.599
	3-6	2.468	2.451	2.463	17.346	17.387	17.346	2.867	2.876	2.862
	4-1	2.577	2.572	2.565	20.032	20.05	19.982	3.665	3.72	3.72
	4-2	2.542	2.313	2.351	13.771	13.602	13.651	2.499	2.478	2.476
	4-3	3.066	3.042	3.031	17.458	17.575	17.731	2.828	2.848	2.859
	4-4	2.463	2.451	2.453	9.744	9.834	9.929	1.843	1.86	1.864
	4-5	2.505	2.49	2.516	17.301	17.357	17.364	2.701	2.713	2.717
	4-6	2.794	2.778	2.801	15.684	15.726	15.809	2.688	2.666	2.678
	5-1	2.895	2.824	2.887	19.201	19.153	19.326	3.535	3.518	3.558
	5-2	1.941	1.956	1.955	15.28	15.279	15.157	2.522	2.524	2.484
	5-3	2.496	2.499	2.494	15.104	15.162	15.068	2.605	2.612	2.594
	5-4	2.385	2.366	2.388	10.505	10.424	10.373	1.951	1.934	1.945
	5-5	2.704	2.648	2.708	14.743	14.605	14.744	2.404	2.382	2.402
	5-6	2.443	2.432	2.443	8.868	8.859	8.887	1.826	1.822	1.827
	6-1	2.432	2.44	2.461	17.539	17.54	17.429	2.716	2.713	2.706
	6-2	2.399	2.373	2.387	14.744	14.714	14.777	3.23	3.228	3.244
	6-3	2.837	2.836	2.851	18.939	18.9	18.905	3.382	3.372	3.371
	6-4	2.414	2.417	2.427	16.958	16.881	16.837	2.878	2.86	2.857
	6-5	2.084	2.068	2.061	15.343	15.358	15.384	2.316	2.315	2.315
	1-1	2.257	2.26	2.251	10.482	10.613	10.518	1.22	1.23	1.219
	1-2	1.164	1.181	1.162	13.6	13.589	13.661	1.395	1.385	1.387
	1-3	2.728	2.735	2.72	14.8	14.882	14.753	1.447	1.459	1.446
	1-4	1.96	1.933	1.949	12.218	12.068	12.103	1.142	1.309	1.131
	2-1	2.983	2.962	2.981	15.503	15.497	15.515	1.412	1.411	1.414
	2-2	2.795	2.781	2.79	8.897	8.928	8.868	0.987	0.993	0.99
	2-3	1.708	1.67	1.708	10.646	10.577	10.671	1.13	1.118	1.131
	2-4	1.686	1.708	1.696	15.855	15.936	15.824	1.535	1.561	1.535
	3-1	2.099	2.07	2.09	11.147	11.04	11.061	1.283	1.27	1.286
	3-2	1.732	1.726	1.722	17.514	17.569	17.613	1.849	1.851	1.843
	3-3	1.62	1.628	1.614	9.804	9.806	9.802	1.119	1.141	1.184
	3-4	1.976	1.981	1.995	19.288	19.216	19.204	1.738	1.741	1.75
	3-5	2.029	2.009	2.025	16.783	16.605	16.719	1.96	1.947	1.965
	3-6	1.144	1.142	1.142	15.735	15.855	15.831	1.545	1.534	1.539
	4-1	2.004	2.008	1.991	9.609	9.503	9.615	0.853	0.855	0.856
	4-2	1.8	1.798	1.805	15.756	15.797	15.681	1.895	1.886	1.885
	4-3	2.121	2.015	2.042	9.215	9.253	9.28	1.361	1.36	1.364
	4-4	2.532	2.508	2.532	6.948	6.912	6.933	1.041	1.052	1.057
	4-5	1.904	1.884	1.872	18.407	18.413	18.258	2.052	2.178	2.029
	4-6	1.973	1.949	1.951	12.836	12.755	12.758	1.668	1.65	1.646
	1-0	3.736	3.711	3.77	21.52	21.477	21.586	1.866	1.887	1.885
	2-0	2.576	2.554	2.569	14.53	14.464	14.601	1.317	1.298	1.307
