# Supplementary material for: Prediction of yield and quality in medicinal plant Ligusticum chuanxiong Hort. using uncrewed aerial vehicle multispectral measurement
Source: PeerJ. 2025 Apr 7;13:e19264. doi: 10.7717/peerj.19264 (PMC11984469; doi:10.7717/peerj.19264)
Supplement: Supplemental Information 2 [file peerj-13-19264-s002.xlsx]

## Sheet: 427
	Red	Green	Blue	Rededge	NIR	r	g	b	RBRI	VDVI	MSRI	OSAVI	RECI	RERDVI	LCI	EVI	WI	GRVI	RVI	RERVI	BRVI	NGRVI	NDVI
region	b1	b2	b3	b4	b5	b1/(b1+b2+b3)	b2/(b1+b2+b3)	b3/(b1+b2+b3)	b1/b3	(2*b2-b1-b3)/(b1+2*b2+b3)	(b5/b1-1)/sqrt(b5/b1+1)	(b5-b1)/(b5+b1+0.16)	b5/b4-1	(b5-b4)/sqrt(b5+b4)	(b5-b4)/(b5+b1)	2.5*[(b5-b1)/(b5+6*b1-7.5*b3+1)]	(b2-b3)/(b1-b2)	b5/b2	b5/b1	b5/b4	b5/b3	(b2-b1)/(b1+b2)	(b5-b1)/(b5+b1)
1-1	0.022834	0.055604	0.018536	0.199857	0.338458	0.233678	0.57533	0.190992	1.22387	0.459774	3.53434	0.601484	0.689627	0.187827	0.380414	0.588228	-1.14248	6.15137	15.5855	1.68963	18.8104	0.421648	0.86921
1-2	0.021469	0.050885	0.017267	0.18138	0.305458	0.238274	0.569242	0.192484	1.23842	0.449991	3.4328	0.579083	0.679129	0.17663	0.375603	0.541959	-1.15053	6.04735	14.8465	1.67913	18.203	0.409158	0.86402
1-3	0.020729	0.046535	0.016679	0.158565	0.261585	0.245428	0.556303	0.198269	1.23707	0.427718	3.19181	0.53777	0.641059	0.157265	0.359567	0.474443	-1.18096	5.61602	13.3067	1.64106	16.2657	0.386206	0.845083
2-1	0.023061	0.05429	0.018821	0.19129	0.318936	0.238351	0.565971	0.195678	1.21969	0.444512	3.37659	0.584802	0.66177	0.177456	0.369446	0.559598	-1.14735	5.91236	14.4679	1.66177	17.3831	0.406599	0.859887
2-2	0.034999	0.057094	0.025858	0.15292	0.220715	0.294133	0.487496	0.218371	1.34687	0.309372	2.00897	0.443596	0.440652	0.110248	0.262679	0.374401	-1.4729	3.89708	6.70466	1.44065	8.91061	0.246469	0.720604
2-3	0.030253	0.051131	0.021921	0.141662	0.215952	0.290673	0.497698	0.211629	1.37396	0.327971	2.1912	0.454414	0.524084	0.123778	0.300097	0.375614	-1.44143	4.25421	7.49553	1.52408	10.1922	0.261848	0.749655
3-1	0.022827	0.053336	0.018729	0.193883	0.329583	0.238337	0.564832	0.196831	1.21019	0.441862	3.48281	0.591998	0.692329	0.185883	0.38028	0.574643	-1.16155	6.20189	15.3165	1.69233	18.2935	0.40513	0.862841
3-2	0.032298	0.056929	0.024008	0.163805	0.247558	0.27986	0.509951	0.210189	1.32925	0.348352	2.36948	0.48355	0.504109	0.129077	0.293923	0.424661	-1.39913	4.42209	8.66954	1.50411	11.1957	0.289825	0.759149
3-3	0.033819	0.057497	0.024295	0.159896	0.239486	0.28885	0.502104	0.209046	1.38075	0.335187	2.20553	0.470121	0.49427	0.124945	0.287666	0.406542	-1.46681	4.21078	7.68335	1.49427	10.4102	0.268557	0.74482
4-1	0.026797	0.056366	0.020904	0.188414	0.303776	0.253724	0.54659	0.199685	1.26861	0.411226	3.03491	0.559021	0.607402	0.163216	0.34515	0.52695	-1.24758	5.43644	12.3608	1.6074	15.3942	0.364343	0.830075
4-2	0.034586	0.057789	0.02524	0.163714	0.242717	0.29069	0.495847	0.213463	1.36221	0.323988	2.18858	0.472033	0.478864	0.123001	0.281626	0.411245	-1.46725	4.25275	7.58105	1.47886	10.1894	0.259572	0.743997
4-3	0.033008	0.056842	0.022959	0.163422	0.245857	0.289119	0.508111	0.20277	1.426	0.345744	2.28408	0.480068	0.500862	0.127822	0.291985	0.416698	-1.49081	4.37291	8.07793	1.50086	11.2934	0.27364	0.755669
5-1	0.024548	0.055632	0.01963	0.194633	0.317785	0.244009	0.559432	0.19656	1.24292	0.433827	3.25395	0.580124	0.630016	0.171161	0.356952	0.554513	-1.17464	5.7688	13.6039	1.63002	16.6576	0.391936	0.852184
5-2	0.037305	0.059152	0.026714	0.157946	0.228472	0.30002	0.483884	0.216096	1.38858	0.303006	1.96938	0.445316	0.443075	0.112583	0.262118	0.380618	-1.54834	3.91052	6.55272	1.44308	8.95638	0.233829	0.71295
5-3	0.040655	0.062689	0.027366	0.16555	0.238928	0.307813	0.483332	0.208854	1.47928	0.301694	1.91525	0.447451	0.4411	0.114553	0.259516	0.387034	-1.73822	3.86474	6.32647	1.4411	9.16302	0.221146	0.703444
6-1	0.023802	0.054388	0.019427	0.191472	0.317816	0.241739	0.55954	0.198721	1.21636	0.433116	3.32221	0.579729	0.654114	0.175555	0.365319	0.555739	-1.17522	5.87246	14.1937	1.65411	16.9645	0.395276	0.852892
6-2	0.038287	0.059507	0.027521	0.155098	0.221922	0.303312	0.4777	0.218988	1.38774	0.291591	1.87772	0.433961	0.428704	0.108187	0.254345	0.367771	-1.62794	3.75468	6.11937	1.4287	8.37866	0.222523	0.700267
6-3	0.037816	0.060578	0.026855	0.164385	0.243417	0.299004	0.487375	0.213621	1.40086	0.309043	2.04285	0.461278	0.478033	0.122769	0.277328	0.403463	-1.56822	4.04856	6.89902	1.47803	9.4833	0.238715	0.723656
7-1	0.026934	0.064525	0.021421	0.223935	0.352006	0.238555	0.571313	0.190132	1.2577	0.453841	3.2246	0.600461	0.569767	0.168069	0.336085	0.598782	-1.14819	5.47353	13.2312	1.56977	16.5768	0.410475	0.855598
7-2	0.027659	0.063664	0.020673	0.211868	0.320843	0.246923	0.568214	0.184863	1.33875	0.448857	2.99559	0.574562	0.512996	0.148817	0.311175	0.549181	-1.19727	5.06511	11.7544	1.513	15.666	0.393828	0.839398
7-3	0.024716	0.057735	0.018625	0.201763	0.319926	0.244342	0.571105	0.184553	1.32756	0.453507	3.21119	0.583663	0.585077	0.163264	0.341818	0.554791	-1.19012	5.56823	13.1104	1.58508	17.2981	0.400422	0.855398
8-1	0.029601	0.068673	0.022995	0.232078	0.362255	0.243919	0.565991	0.190089	1.28596	0.445342	3.10381	0.600934	0.560172	0.168394	0.330961	0.606901	-1.171	5.32108	12.4394	1.56017	15.8859	0.397461	0.847487
8-2	0.026815	0.063362	0.020336	0.220739	0.348776	0.242245	0.573718	0.184037	1.31829	0.457746	3.22537	0.598842	0.578073	0.169008	0.338986	0.591599	-1.18046	5.53428	13.249	1.57807	17.3789	0.405895	0.855255
8-3	0.024361	0.057823	0.017999	0.198762	0.314923	0.242958	0.577291	0.179751	1.3533	0.463667	3.20591	0.580723	0.583786	0.161766	0.341405	0.547066	-1.19248	5.46119	13.0671	1.58379	17.623	0.407382	0.855269
9-1	0.029544	0.069258	0.021891	0.231577	0.358288	0.244495	0.573678	0.181827	1.34818	0.457795	3.08394	0.596993	0.543806	0.164051	0.32391	0.597363	-1.1952	5.20619	12.3528	1.54381	16.4909	0.402154	0.844827
9-2	0.028866	0.064297	0.02102	0.208347	0.3144	0.252789	0.562858	0.184352	1.37342	0.440099	2.87405	0.565168	0.507538	0.146177	0.307404	0.535456	-1.22621	4.90211	11.0098	1.50754	15.0665	0.379812	0.829706
9-3	0.026175	0.056057	0.01979	0.186433	0.287372	0.256043	0.549465	0.194492	1.32124	0.417843	2.9047	0.550166	0.540861	0.146247	0.320444	0.503205	-1.21461	5.18775	11.2215	1.54086	14.7181	0.363804	0.831387
10-1	0.026127	0.067058	0.020785	0.244932	0.406863	0.229023	0.5885	0.182477	1.2572	0.481616	3.59148	0.639994	0.65873	0.199859	0.371933	0.674575	-1.13155	6.09761	15.7848	1.65873	19.7556	0.43954	0.877655
10-2	0.028699	0.064884	0.021466	0.216024	0.332714	0.249015	0.564252	0.186733	1.33536	0.442428	3.00451	0.5807	0.538475	0.156916	0.320901	0.564276	-1.20492	5.16574	11.8567	1.53848	15.6914	0.387415	0.838638
10-3	0.029666	0.063799	0.021022	0.193127	0.283486	0.259033	0.556907	0.184059	1.41186	0.430356	2.64072	0.535211	0.468235	0.130681	0.287857	0.486045	-1.25628	4.46334	9.64974	1.46823	13.5673	0.364757	0.809349
11-1	0.025281	0.06396	0.020519	0.241399	0.406249	0.230108	0.582488	0.187404	1.231	0.472023	3.66483	0.64289	0.682438	0.204464	0.380916	0.677494	-1.12352	6.40514	16.2992	1.68244	19.9292	0.433476	0.881994
11-2	0.025454	0.061503	0.020127	0.226399	0.373594	0.237617	0.574191	0.188191	1.26598	0.458562	3.46275	0.620914	0.648357	0.18946	0.367237	0.631558	-1.14947	6.10119	14.8327	1.64836	18.6881	0.414269	0.870988
11-3	0.024506	0.059696	0.018342	0.212315	0.345773	0.23844	0.582593	0.178966	1.33431	0.472115	3.3936	0.604158	0.627041	0.178126	0.358765	0.591679	-1.17857	5.82488	14.3889	1.62704	19.0505	0.418988	0.866021
12-1	0.025331	0.064762	0.020307	0.237747	0.39126	0.229318	0.586512	0.18417	1.24755	0.478429	3.57338	0.632838	0.644222	0.193025	0.36711	0.656313	-1.12866	6.07231	15.6307	1.64422	19.4108	0.437633	0.877123
12-2	0.026087	0.060571	0.020633	0.220919	0.365458	0.242786	0.564633	0.192581	1.26425	0.442661	3.37698	0.61325	0.652571	0.188127	0.367404	0.619108	-1.16206	6.08291	14.2739	1.65257	17.9336	0.397974	0.865162
12-3	0.024177	0.057624	0.017664	0.202911	0.324922	0.24298	0.579213	0.177807	1.36981	0.466717	3.28201	0.589333	0.600597	0.167614	0.34858	0.56131	-1.19772	5.65652	13.573	1.6006	18.5076	0.408723	0.860291
1-1	0.03361	0.075195	0.02707	0.287242	0.468485	0.247117	0.553594	0.199289	1.24459	0.424931	3.36058	0.656334	0.632356	0.20845	0.360973	0.74055	-1.15864	6.2565	14.0741	1.63236	17.4606	0.382509	0.865976
1-2	0.033997	0.075097	0.02589	0.280381	0.441893	0.251762	0.556061	0.192177	1.31864	0.428763	3.21918	0.639044	0.576159	0.189558	0.338444	0.700565	-1.20443	5.9191	13.1773	1.57616	17.2002	0.376384	0.855551
1-3	0.033127	0.078163	0.02624	0.302331	0.494281	0.240604	0.568668	0.190728	1.26587	0.44965	3.50251	0.670358	0.635881	0.214989	0.363862	0.769965	-1.15432	6.3484	15.0688	1.63588	19.0353	0.405091	0.87421
1-4	0.031223	0.074656	0.025219	0.297373	0.500281	0.238056	0.568928	0.193016	1.24038	0.450145	3.65686	0.677655	0.68465	0.227134	0.381736	0.781827	-1.13841	6.75862	16.1995	1.68465	19.9645	0.409866	0.882355
1-5	0.029967	0.072975	0.024427	0.296321	0.509401	0.235245	0.572587	0.192168	1.23005	0.455883	3.78465	0.684922	0.720912	0.237337	0.395112	0.795148	-1.13012	7.0256	17.155	1.72091	21.026	0.417216	0.888752
1-6	0.029791	0.074766	0.02423	0.301522	0.515572	0.231106	0.580652	0.188242	1.23321	0.469031	3.82681	0.688259	0.711976	0.2368	0.392658	0.802305	-1.12416	6.93576	17.4764	1.71198	21.4908	0.430378	0.890761
1-7	0.02797	0.07407	0.022355	0.304216	0.525472	0.224465	0.595497	0.180038	1.25284	0.492605	4.01988	0.69701	0.729004	0.24289	0.399799	0.814863	-1.12193	7.14015	19.0305	1.729	23.6974	0.452351	0.89891
1-8	0.026548	0.068431	0.022036	0.290501	0.513872	0.226677	0.584405	0.188919	1.20751	0.47488	4.0903	0.695279	0.771766	0.24907	0.413514	0.807332	-1.1081	7.57812	19.6063	1.77177	23.533	0.440767	0.901775
1-9	0.023882	0.065997	0.019566	0.278778	0.487036	0.218071	0.602744	0.179186	1.22285	0.503986	4.21018	0.690038	0.749467	0.238022	0.407722	0.780156	-1.10284	7.43085	20.6	1.74947	25.0576	0.468522	0.906482
1-10	0.023952	0.064019	0.019236	0.267572	0.46179	0.222959	0.59696	0.180081	1.24493	0.494971	4.08808	0.677685	0.728852	0.227455	0.400008	0.74864	-1.1164	7.29335	19.6068	1.72885	24.2236	0.456068	0.901482
1-11	0.019886	0.056495	0.016738	0.24698	0.452381	0.213328	0.606644	0.180028	1.19034	0.5101	4.48102	0.683736	0.834138	0.245615	0.434881	0.747339	-1.08562	8.0561	22.9841	1.83414	27.2246	0.479575	0.915731
1-12	0.020265	0.055349	0.016694	0.231552	0.410692	0.219195	0.599538	0.181268	1.21707	0.498921	4.19879	0.660315	0.775917	0.223523	0.415712	0.693293	-1.1008	7.47639	20.5063	1.77592	24.832	0.464371	0.906045
1-13	0.018881	0.052919	0.015591	0.219779	0.394885	0.215864	0.605354	0.178781	1.21419	0.508076	4.27095	0.655084	0.799197	0.223379	0.423247	0.675444	-1.09609	7.51074	21.1179	1.7992	25.5112	0.474173	0.908739
1-14	0.020185	0.054241	0.015729	0.211873	0.358229	0.223661	0.601604	0.174735	1.28463	0.502299	3.88334	0.627529	0.692462	0.193822	0.386688	0.620533	-1.13061	6.64394	17.9235	1.69246	22.9295	0.457879	0.893235
2-1	0.021765	0.060898	0.017655	0.248858	0.436415	0.216774	0.60706	0.176166	1.23354	0.510815	4.16484	0.670497	0.75465	0.226534	0.409307	0.72231	-1.10425	7.201	20.2026	1.75465	24.8594	0.473624	0.904971
2-2	0.019671	0.055434	0.016309	0.232932	0.416363	0.215022	0.6063	0.178678	1.2063	0.509585	4.29748	0.665229	0.788893	0.227628	0.420726	0.701994	-1.09313	7.55232	21.3421	1.78889	25.6853	0.47623	0.90972
2-3	0.021996	0.058262	0.017339	0.224985	0.370498	0.22547	0.596411	0.178119	1.26852	0.494118	3.75496	0.629812	0.647693	0.188447	0.370678	0.63399	-1.12807	6.38072	16.9117	1.64769	21.4315	0.451108	0.887574
2-4	0.019686	0.05271	0.016442	0.214955	0.377265	0.2214	0.593389	0.185211	1.19781	0.489412	4.05712	0.641308	0.755525	0.210743	0.408496	0.650969	-1.09777	7.18754	19.3295	1.75553	23.088	0.456388	0.900469
2-5	0.020884	0.053914	0.016542	0.209744	0.350734	0.228622	0.589879	0.181499	1.26161	0.483856	3.75169	0.619066	0.672737	0.188039	0.378729	0.60892	-1.13142	6.53154	16.9265	1.67274	21.2824	0.441197	0.886822
2-6	0.022569	0.054355	0.017833	0.201828	0.325745	0.237918	0.573594	0.188488	1.26363	0.457659	3.43089	0.594343	0.612884	0.170091	0.354359	0.569633	-1.15063	6.01113	14.6173	1.61288	18.3878	0.413381	0.868932
2-7	0.023061	0.055943	0.017508	0.201507	0.317155	0.23867	0.579698	0.181632	1.31609	0.467611	3.33002	0.586757	0.573961	0.160336	0.339329	0.554409	-1.16894	5.68696	13.8727	1.57396	18.2093	0.416531	0.863892
2-8	0.024575	0.056908	0.018088	0.197636	0.310322	0.246465	0.571536	0.181999	1.35709	0.454463	3.16133	0.575909	0.569607	0.157763	0.33549	0.539441	-1.20173	5.47417	12.777	1.56961	17.2511	0.397283	0.852133
2-9	0.025465	0.058883	0.01877	0.200466	0.307695	0.246842	0.570829	0.182329	1.35514	0.453203	3.07293	0.570703	0.536363	0.150288	0.321706	0.533642	-1.20315	5.24102	12.2024	1.53636	16.484	0.395979	0.846067
2-10	0.025253	0.057259	0.018794	0.196774	0.30072	0.249263	0.564632	0.186105	1.34307	0.443127	3.04313	0.565272	0.529594	0.147182	0.318492	0.524207	-1.2026	5.28013	12.0048	1.52959	16.0576	0.387216	0.844177
2-11	0.024113	0.056567	0.018479	0.204294	0.325886	0.24312	0.570056	0.186824	1.30323	0.451928	3.29335	0.589983	0.59501	0.166638	0.346555	0.565234	-1.17545	5.78293	13.6422	1.59501	17.7172	0.401763	0.861156
2-12	0.02282	0.05847	0.017962	0.217489	0.349847	0.229942	0.58885	0.181208	1.2703	0.482187	3.54967	0.612154	0.608074	0.175347	0.354366	0.603366	-1.13729	5.99202	15.4222	1.60807	19.5497	0.438136	0.876511
2-13	0.019378	0.055029	0.016388	0.231391	0.415592	0.213201	0.605931	0.180867	1.18243	0.50903	4.33082	0.665577	0.798072	0.229015	0.423661	0.702628	-1.08242	7.59866	21.6258	1.79807	25.4797	0.479302	0.910956
2-14	0.02187	0.057048	0.017813	0.227081	0.383334	0.225945	0.589701	0.184354	1.2272	0.48355	3.84927	0.638222	0.688022	0.199691	0.384969	0.653325	-1.11556	6.73992	17.679	1.68802	21.636	0.445787	0.891353
2-15	0.020932	0.058174	0.017388	0.239823	0.420561	0.216754	0.602796	0.18045	1.20406	0.504178	4.16828	0.663958	0.755335	0.222391	0.409448	0.705222	-1.09412	7.26029	20.2301	1.75534	24.3145	0.470899	0.905108
2-16	0.020991	0.058865	0.017278	0.240746	0.426461	0.215909	0.605845	0.178246	1.21509	0.508835	4.19901	0.667225	0.772943	0.227355	0.415077	0.712149	-1.09688	7.28892	20.4972	1.77294	24.8268	0.474313	0.906175
2-17	0.021833	0.059209	0.018072	0.240871	0.41269	0.220213	0.597064	0.182722	1.20798	0.495093	4.02492	0.656623	0.714526	0.212417	0.39534	0.693131	-1.10021	7.00545	19.0574	1.71453	22.9615	0.460859	0.899309
2-18	0.021299	0.060204	0.017547	0.251767	0.443393	0.21475	0.607849	0.1774	1.21362	0.512001	4.2597	0.675468	0.76265	0.229839	0.412392	0.732779	-1.0954	7.40692	21.0254	1.76265	25.4389	0.47773	0.908297
1-1	0.031636	0.079467	0.029542	0.296143	0.48078	0.224842	0.564864	0.210294	1.0719	0.443633	3.53508	0.6672	0.624148	0.209338	0.360125	0.774096	-1.04306	6.0719	15.2917	1.62415	16.3429	0.430409	0.876189
1-2	0.032988	0.080884	0.030684	0.292786	0.459844	0.228105	0.559479	0.212416	1.07747	0.434733	3.35398	0.651838	0.569704	0.19204	0.337839	0.745553	-1.04816	5.70232	14.0617	1.5697	15.0833	0.420557	0.864858
1-3	0.033464	0.086257	0.031204	0.330149	0.53939	0.221334	0.571892	0.206774	1.07365	0.454931	3.67055	0.689256	0.634689	0.2242	0.365189	0.838307	-1.04193	6.27958	16.3155	1.63469	17.4742	0.441662	0.882814
1-4	0.033496	0.08544	0.032314	0.336558	0.557774	0.221368	0.564727	0.213904	1.03737	0.443424	3.73427	0.697288	0.658473	0.233854	0.374224	0.863486	-1.02174	6.557	16.7519	1.65847	17.3429	0.436634	0.886636
1-5	0.0331	0.084171	0.030772	0.323469	0.526911	0.223393	0.568438	0.208169	1.07611	0.449459	3.63876	0.684987	0.630054	0.220494	0.363316	0.824755	-1.04457	6.29184	16.0546	1.63005	17.2249	0.435616	0.881603
1-6	0.031072	0.081485	0.027566	0.32411	0.54296	0.221418	0.581554	0.197028	1.12876	0.470552	3.84838	0.696676	0.676044	0.234883	0.381099	0.83958	-1.06839	6.70059	17.6594	1.67604	19.8424	0.448343	0.891526
2-1	0.033103	0.081642	0.029787	0.281367	0.433561	0.228815	0.56487	0.206315	1.1121	0.443601	3.23201	0.637793	0.540919	0.179698	0.325431	0.709488	-1.06762	5.33252	13.2261	1.54092	14.6551	0.423226	0.857418
2-2	0.03252	0.082146	0.030261	0.299548	0.475777	0.224183	0.566787	0.20903	1.07556	0.446761	3.45821	0.662634	0.589252	0.20004	0.346613	0.766728	-1.04425	5.82043	14.7439	1.58925	15.8063	0.43297	0.871925
2-3	0.033837	0.083995	0.031619	0.31008	0.491095	0.226232	0.561957	0.211811	1.0714	0.438778	3.43888	0.666422	0.584109	0.201999	0.344605	0.783175	-1.04297	5.86397	14.6125	1.58411	15.626	0.425684	0.870679
2-4	0.033517	0.085859	0.030401	0.317732	0.503494	0.223589	0.573294	0.203117	1.10429	0.457298	3.51211	0.673575	0.585579	0.204896	0.345967	0.794781	-1.05834	5.88435	15.1199	1.58558	16.6743	0.438632	0.875075
2-5	0.032192	0.082981	0.029066	0.299405	0.469398	0.222972	0.575422	0.201607	1.10852	0.460813	3.45069	0.659936	0.568464	0.193731	0.338789	0.75561	-1.06092	5.67812	14.6988	1.56846	16.2618	0.441331	0.871338
2-6	0.031987	0.083633	0.027511	0.313379	0.500519	0.223159	0.584406	0.192435	1.16376	0.475202	3.60383	0.676038	0.598169	0.20738	0.351537	0.787487	-1.08566	6.01298	15.7934	1.59817	18.3088	0.447245	0.879852
3-1	0.032233	0.080987	0.029256	0.288137	0.454239	0.226011	0.568338	0.205651	1.10144	0.449303	3.37895	0.651026	0.575917	0.192321	0.340423	0.73703	-1.06132	5.62508	14.2259	1.57592	15.5805	0.430858	0.866451
3-2	0.031189	0.081367	0.028883	0.30141	0.479834	0.220316	0.575396	0.204289	1.0807	0.460785	3.56233	0.66805	0.592489	0.201754	0.349	0.772677	-1.04532	5.9139	15.481	1.59249	16.6989	0.44613	0.877819
3-3	0.031306	0.079925	0.029423	0.297834	0.475839	0.222465	0.568279	0.209255	1.06609	0.449152	3.53466	0.665478	0.597765	0.202164	0.350545	0.769244	-1.03818	5.96764	15.2944	1.59777	16.2873	0.437105	0.876083
3-4	0.030699	0.078578	0.028873	0.295483	0.467693	0.222068	0.568796	0.209135	1.06654	0.450019	3.54013	0.663052	0.583313	0.196975	0.345218	0.760471	-1.03666	5.97547	15.3234	1.58331	16.2907	0.438234	0.876559
3-5	0.031693	0.08255	0.029297	0.30341	0.476352	0.220538	0.575315	0.204147	1.08236	0.460611	3.51591	0.664855	0.570515	0.195685	0.340147	0.767464	-1.04653	5.7938	15.1633	1.57052	16.3771	0.445627	0.875013
3-6	0.030887	0.080989	0.026756	0.298581	0.474923	0.222458	0.584346	0.193196	1.15481	0.47504	3.56669	0.666119	0.591248	0.200361	0.348431	0.759654	-1.08134	5.88893	15.543	1.59125	17.8982	0.448369	0.877536
4-1	0.032145	0.080237	0.028818	0.287159	0.454263	0.227576	0.568198	0.204225	1.11714	0.449114	3.38218	0.65253	0.58321	0.194017	0.343435	0.736939	-1.06855	5.67954	14.2026	1.58321	15.8369	0.427906	0.867684
4-2	0.030928	0.07782	0.028852	0.283615	0.452919	0.224533	0.565669	0.209798	1.074	0.444798	3.4605	0.65478	0.597736	0.197133	0.349542	0.74128	-1.0448	5.84117	14.7651	1.59774	15.7894	0.431459	0.871908
4-3	0.03016	0.079408	0.029058	0.297053	0.480387	0.217399	0.572845	0.209756	1.03913	0.456587	3.63738	0.670681	0.61777	0.207769	0.358804	0.778942	-1.02114	6.07126	16.0445	1.61777	16.6417	0.449588	0.881531
4-4	0.031008	0.079788	0.030026	0.310309	0.508	0.220066	0.566601	0.213334	1.03393	0.446478	3.6972	0.681834	0.638043	0.218456	0.366692	0.811125	-1.0192	6.38659	16.4738	1.63804	17.0111	0.440337	0.884809
4-5	0.033634	0.08694	0.0297	0.314229	0.495915	0.223642	0.578438	0.19792	1.13246	0.465709	3.47494	0.669604	0.579308	0.201747	0.343039	0.782588	-1.07323	5.73175	14.8699	1.57931	16.7736	0.442294	0.872735
4-6	0.031704	0.081014	0.027795	0.30221	0.487153	0.225287	0.576761	0.197952	1.14075	0.462875	3.56546	0.66928	0.611532	0.207726	0.355558	0.77345	-1.07966	6.03769	15.5613	1.61153	17.6609	0.438076	0.876858
5-1	0.03118	0.077646	0.029213	0.279051	0.442341	0.225706	0.562628	0.211666	1.06847	0.439969	3.3912	0.648295	0.585615	0.192095	0.344449	0.728164	-1.0418	5.71143	14.281	1.58561	15.2225	0.427198	0.867919
5-2	0.031041	0.080129	0.028651	0.298465	0.482235	0.221706	0.573173	0.205121	1.08388	0.457098	3.58813	0.66949	0.616556	0.207845	0.3577	0.775355	-1.04938	6.04249	15.6914	1.61656	16.9144	0.442056	0.878774
5-3	0.033574	0.081992	0.031549	0.299644	0.477115	0.228042	0.557409	0.21455	1.0653	0.431251	3.39615	0.660165	0.593014	0.201138	0.347157	0.767719	-1.04201	5.83737	14.3209	1.59301	15.2098	0.419049	0.868063
5-4	0.032429	0.083913	0.03068	0.318463	0.515102	0.220361	0.570734	0.208905	1.05679	0.453179	3.63369	0.681281	0.618529	0.21523	0.358973	0.814398	-1.03297	6.1634	16.027	1.61853	16.8959	0.442715	0.88117
5-5	0.034693	0.087339	0.031953	0.316622	0.499674	0.225038	0.567378	0.207584	1.08666	0.447633	3.42634	0.668293	0.579415	0.202427	0.342497	0.790125	-1.05153	5.73908	14.5409	1.57942	15.7704	0.431758	0.869635
5-6	0.034338	0.087815	0.031278	0.327694	0.526269	0.223357	0.572779	0.203864	1.09835	0.456429	3.56333	0.68201	0.606824	0.214754	0.354047	0.820319	-1.05701	6.02083	15.5212	1.60682	16.9757	0.43871	0.877322
6-1	0.033587	0.079872	0.030624	0.282127	0.444101	0.232916	0.554397	0.212687	1.09766	0.426323	3.25019	0.642534	0.574522	0.189824	0.338541	0.723688	-1.06448	5.57757	13.3451	1.57452	14.5957	0.408106	0.85857
6-2	0.031533	0.078721	0.02927	0.284094	0.449431	0.225703	0.564359	0.209938	1.07701	0.442778	3.40489	0.651182	0.582749	0.192911	0.343533	0.735359	-1.04732	5.7295	14.3848	1.58275	15.4431	0.428459	0.86855
6-3	0.034943	0.082101	0.030674	0.281506	0.429843	0.236361	0.555761	0.207878	1.13915	0.428553	3.10838	0.630069	0.526858	0.17548	0.318297	0.698762	-1.0938	5.24869	12.4419	1.52686	14.0686	0.403083	0.848306
6-4	0.03262	0.084281	0.030429	0.31156	0.494138	0.221319	0.571819	0.206863	1.07224	0.454931	3.52697	0.670926	0.586487	0.203179	0.346299	0.788041	-1.04123	5.88135	15.2325	1.58649	16.2978	0.441721	0.875767
6-5	0.033324	0.085489	0.030832	0.312629	0.487827	0.222499	0.571303	0.206198	1.08156	0.454052	3.45875	0.666174	0.561453	0.19567	0.336092	0.778823	-1.0472	5.72612	14.7573	1.56145	15.9154	0.439193	0.871779
1-0	0.030667	0.062294	0.027093	0.244241	0.386851	0.255084	0.519079	0.225837	1.13157	0.36633	3.16375	0.614601	0.583127	0.179055	0.340606	0.649542	-1.12081	6.23647	12.8207	1.58313	14.3752	0.340803	0.851596
1-1	0.028993	0.060362	0.026444	0.240047	0.380922	0.250132	0.521218	0.22865	1.096	0.37024	3.23967	0.615564	0.586483	0.178378	0.342938	0.647076	-1.08584	6.3351	13.295	1.58648	14.4688	0.351377	0.857361
1-2	0.029183	0.060424	0.026429	0.235264	0.371625	0.251031	0.521113	0.227856	1.1032	0.369847	3.1854	0.608876	0.579651	0.174721	0.33969	0.633457	-1.09205	6.18043	12.9564	1.57965	14.2109	0.349487	0.85339
1-3	0.03018	0.062755	0.027288	0.245091	0.387068	0.250886	0.522098	0.227016	1.10642	0.37164	3.19144	0.616589	0.579208	0.178222	0.339606	0.653025	-1.09419	6.19197	12.9659	1.57921	14.2759	0.350642	0.854446
1-4	0.030237	0.060958	0.026868	0.238426	0.379046	0.256099	0.516127	0.227774	1.12589	0.361306	3.14559	0.610559	0.589842	0.178539	0.342793	0.640067	-1.11901	6.24077	12.681	1.58984	14.1622	0.336635	0.850995
2-0	0.02942	0.062804	0.026472	0.251947	0.402046	0.247942	0.528728	0.22333	1.11198	0.383119	3.31508	0.628327	0.59591	0.185294	0.347472	0.673564	-1.09138	6.42917	13.7749	1.59591	15.2473	0.361355	0.862886
2-1	0.0283	0.062228	0.025674	0.25238	0.40888	0.243391	0.535326	0.221283	1.10256	0.394344	3.4358	0.635474	0.620012	0.192056	0.357257	0.684883	-1.07946	6.61158	14.6389	1.62001	16.0279	0.374731	0.869564
2-2	0.029528	0.062746	0.027209	0.249666	0.401124	0.246883	0.525084	0.228033	1.08423	0.376941	3.31095	0.627534	0.607288	0.187439	0.351132	0.674657	-1.07285	6.43986	13.7711	1.60729	14.8366	0.360317	0.862041
2-3	0.030785	0.064028	0.027924	0.251426	0.402881	0.250508	0.521749	0.227743	1.10202	0.371031	3.23555	0.624488	0.602014	0.186775	0.348406	0.673177	-1.09455	6.31704	13.2861	1.60201	14.5085	0.35114	0.856597
2-4	0.031054	0.064233	0.026699	0.249008	0.395764	0.254465	0.526466	0.219068	1.16367	0.379209	3.18144	0.619691	0.590168	0.182461	0.343413	0.658252	-1.13652	6.20094	12.9032	1.59017	14.9407	0.348155	0.853645
3-1	0.030489	0.077519	0.025967	0.32474	0.541935	0.22738	0.578463	0.194157	1.17508	0.465505	3.8856	0.697555	0.669841	0.233196	0.379436	0.834642	-1.0949	7.03035	17.948	1.66984	21.0421	0.435344	0.893253
3-2	0.028223	0.074669	0.023886	0.319723	0.539721	0.22234	0.589198	0.188462	1.18273	0.482654	4.05556	0.702077	0.68912	0.237232	0.387462	0.834935	-1.09234	7.26161	19.3062	1.68912	22.8302	0.451727	0.900564
3-3	0.028344	0.073358	0.024152	0.302542	0.497004	0.224984	0.583138	0.191878	1.17475	0.473049	3.85181	0.68315	0.643355	0.217368	0.370165	0.787615	-1.09278	6.79379	17.6679	1.64335	20.7437	0.442904	0.891961
3-4	0.028301	0.072555	0.023972	0.294897	0.483764	0.226645	0.580809	0.192546	1.18053	0.46924	3.79797	0.677097	0.642459	0.214055	0.369157	0.771789	-1.09634	6.71866	17.2587	1.64246	20.3459	0.438244	0.88939
3-5	0.027278	0.072188	0.023073	0.3001	0.496931	0.222367	0.589185	0.188448	1.18352	0.482624	3.94321	0.685984	0.657065	0.220458	0.375614	0.788737	-1.09264	6.92137	18.3998	1.65707	21.7481	0.451678	0.895836
3-6	0.026363	0.070753	0.021645	0.292175	0.475596	0.22166	0.595999	0.182341	1.21808	0.493418	3.92233	0.678065	0.628524	0.209249	0.365391	0.762562	-1.1058	6.75425	18.2449	1.62852	22.1781	0.457562	0.894806
4-1	0.029951	0.078695	0.025263	0.336174	0.559566	0.223366	0.58792	0.188714	1.18669	0.48066	4.00254	0.705835	0.664982	0.235845	0.378713	0.853254	-1.09547	7.14679	18.894	1.66498	22.3812	0.449085	0.898148
4-2	0.029298	0.075379	0.024856	0.317841	0.531165	0.226055	0.581964	0.191981	1.18031	0.471204	3.92944	0.695987	0.672744	0.231491	0.380865	0.824244	-1.09607	7.08076	18.2766	1.67274	21.5515	0.440227	0.895436
4-3	0.028066	0.073861	0.023602	0.312163	0.523223	0.223313	0.588722	0.187966	1.19219	0.481805	3.99603	0.695251	0.67679	0.230744	0.382707	0.81613	-1.09681	7.11174	18.8391	1.67679	22.4597	0.449589	0.8979
4-4	0.027417	0.069337	0.024736	0.302735	0.519333	0.225461	0.570793	0.203747	1.10982	0.453065	4.03477	0.695381	0.717286	0.238857	0.396352	0.819888	-1.06324	7.53409	19.145	1.71729	21.2138	0.433313	0.899612
4-5	0.027895	0.072637	0.023407	0.295827	0.482617	0.224543	0.586471	0.188986	1.19151	0.478304	3.83722	0.677276	0.632924	0.211596	0.365922	0.769884	-1.0995	6.69783	17.6042	1.63292	20.9078	0.445988	0.89053
4-6	0.026303	0.069815	0.021862	0.29367	0.48511	0.222531	0.592122	0.185347	1.20358	0.487329	3.97715	0.682819	0.65297	0.216863	0.374365	0.774858	-1.10151	6.99051	18.6862	1.65297	22.4339	0.453458	0.897112

## Sheet: 508
	Red	Green	Blue	Rededge	NIR	r	g	b	RBRI	VDVI	MSRI	OSAVI	RECI	RERDVI	LCI	EVI	WI	GRVI	RVI	RERVI	BRVI	NGRVI	NDVI
region	b1	b2	b3	b4	b5	b1/(b1+b2+b3)	b2/(b1+b2+b3)	b3/(b1+b2+b3)	b1/b3	(2*b2-b1-b3)/(b1+2*b2+b3)	(b5/b1-1)/sqrt(b5/b1+1)	(b5-b1)/(b5+b1+0.16)	b5/b4-1	(b5-b4)/sqrt(b5+b4)	(b5-b4)/(b5+b1)	2.5*[(b5-b1)/(b5+6*b1-7.5*b3+1)]	(b2-b3)/(b1-b2)	b5/b2	b5/b1	b5/b4	b5/b3	(b2-b1)/(b1+b2)	(b5-b1)/(b5+b1)
1-1	0.023088	0.055801	0.018682	0.199354	0.336609	0.23472	0.573942	0.191338	1.22702	0.457488	3.50328	0.599108	0.131778	0.18637	0.378278	0.584833	-1.1469	6.10153	15.3789	1.68464	18.5891	0.418806	0.867017
1-2	0.022857	0.051898	0.018118	0.179507	0.2974	0.243526	0.561974	0.194499	1.25171	0.437707	3.28168	0.566767	0.116177	0.169332	0.363518	0.526135	-1.18058	5.8005	13.9025	1.65116	17.1593	0.394394	0.851142
1-3	0.020284	0.046629	0.016431	0.160737	0.265926	0.242338	0.560752	0.19691	1.23071	0.435432	3.25651	0.544757	0.104249	0.159595	0.362972	0.482928	-1.1625	5.69833	13.6663	1.64717	16.665	0.395195	0.851828
2-1	0.022944	0.054349	0.018775	0.192282	0.321164	0.237468	0.56711	0.195422	1.2169	0.446435	3.39959	0.587262	0.126293	0.178682	0.370948	0.563354	-1.14266	5.94808	14.6126	1.66507	17.5312	0.409014	0.861759
2-2	0.035407	0.057953	0.026119	0.155137	0.224192	0.293336	0.489015	0.217648	1.34734	0.311955	2.02222	0.446527	0.081621	0.111425	0.263512	0.379318	-1.47715	3.90454	6.78433	1.44231	9.00325	0.24911	0.721166
2-3	0.030044	0.051201	0.021799	0.143019	0.218216	0.289248	0.499775	0.210977	1.37154	0.33172	2.22097	0.458446	0.078362	0.124692	0.301405	0.380125	-1.43048	4.29676	7.63039	1.52557	10.3577	0.266113	0.753935
3-1	0.023415	0.053551	0.019079	0.192301	0.325803	0.240631	0.561544	0.197825	1.21515	0.436176	3.42682	0.586443	0.125742	0.183568	0.376734	0.567384	-1.18363	6.11927	14.9929	1.6854	17.9283	0.398508	0.857071
3-2	0.033377	0.05753	0.024621	0.162506	0.244415	0.282834	0.506101	0.211066	1.33749	0.341376	2.3077	0.476022	0.089952	0.126827	0.289336	0.416724	-1.44135	4.33331	8.39071	1.4964	10.8804	0.281389	0.749123
3-3	0.034204	0.057838	0.024478	0.160223	0.23984	0.289421	0.501673	0.208906	1.38434	0.334354	2.19752	0.469396	0.087133	0.124896	0.28708	0.406177	-1.4857	4.19962	7.65547	1.49358	10.3854	0.267235	0.742887
4-1	0.027159	0.056566	0.02114	0.187539	0.301018	0.255015	0.544547	0.200438	1.27041	0.407821	2.99555	0.555249	0.117441	0.161082	0.341773	0.521912	-1.25401	5.3738	12.1271	1.59984	15.1058	0.360559	0.826393
4-2	0.035246	0.058253	0.02564	0.163495	0.242013	0.291898	0.494205	0.213897	1.36478	0.320922	2.16428	0.46889	0.0885	0.122334	0.279817	0.408474	-1.4934	4.21694	7.48973	1.47631	10.0713	0.256029	0.739004
4-3	0.033433	0.057369	0.023196	0.164056	0.246122	0.289383	0.508055	0.202563	1.42877	0.345557	2.27252	0.478899	0.091126	0.127059	0.289803	0.416053	-1.50239	4.34526	8.03859	1.49635	11.2553	0.27311	0.753051
5-1	0.024682	0.055516	0.019782	0.194353	0.318009	0.244855	0.557372	0.197774	1.23937	0.430393	3.24602	0.579741	0.125864	0.171842	0.357975	0.55466	-1.18163	5.78515	13.5584	1.63335	16.5452	0.388899	0.851383
5-2	0.038164	0.059707	0.027187	0.157671	0.227658	0.30177	0.481769	0.216461	1.39409	0.299025	1.93926	0.441422	0.08034	0.111869	0.260075	0.377139	-1.59585	3.86899	6.44081	1.44038	8.82352	0.228955	0.706543
5-3	0.043259	0.064511	0.02878	0.164215	0.234962	0.313104	0.476735	0.21016	1.49569	0.289551	1.80925	0.433904	0.079461	0.11114	0.251375	0.37398	-1.85197	3.70657	5.90328	1.4287	8.63425	0.206413	0.683179
6-1	0.023644	0.054275	0.019356	0.191662	0.318535	0.241137	0.560105	0.198757	1.21341	0.434143	3.33657	0.581058	0.124957	0.176174	0.366382	0.55734	-1.16738	5.89869	14.2755	1.65642	17.0387	0.396793	0.854472
6-2	0.038882	0.059972	0.027891	0.154981	0.221604	0.304353	0.476305	0.219342	1.39037	0.289022	1.85724	0.43162	0.077326	0.107935	0.253398	0.365869	-1.66281	3.72575	6.04044	1.42777	8.28121	0.219518	0.696201
6-3	0.040174	0.061826	0.028139	0.162247	0.237537	0.305911	0.478622	0.215466	1.42131	0.293358	1.91196	0.446933	0.081589	0.118201	0.267855	0.387936	-1.65319	3.87289	6.28737	1.4618	8.79654	0.219452	0.704458
7-1	0.028432	0.081776	0.022061	0.322129	0.487241	0.214797	0.617679	0.167525	1.28686	0.52713	3.81444	0.678157	0.51519	0.183521	0.320318	0.767477	-1.11809	6.04681	17.4234	1.51519	22.3164	0.483865	0.889556
7-2	0.029512	0.079984	0.021322	0.300686	0.42422	0.225576	0.611003	0.163421	1.38448	0.51682	3.41907	0.642056	0.410873	0.144835	0.271446	0.683648	-1.16229	5.33673	14.4917	1.41087	19.9958	0.460537	0.869236
7-3	0.02629	0.072035	0.02015	0.286237	0.429766	0.221927	0.607632	0.170441	1.30533	0.511489	3.69549	0.654221	0.50197	0.169438	0.314091	0.701604	-1.13515	6.00522	16.4854	1.50197	21.4355	0.464672	0.884339
8-1	0.029478	0.085974	0.022796	0.340761	0.521661	0.21296	0.621444	0.165596	1.29014	0.532875	3.89947	0.69153	0.534079	0.194865	0.328543	0.804684	-1.11747	6.18257	18.1202	1.53408	23.1827	0.489507	0.893147
8-2	0.029016	0.080182	0.02204	0.311234	0.465716	0.221112	0.610118	0.168769	1.31404	0.515423	3.66961	0.666054	0.499259	0.175258	0.312413	0.739279	-1.13613	5.89712	16.3169	1.49926	21.3114	0.467818	0.882648
8-3	0.028208	0.076389	0.020826	0.293061	0.426054	0.224891	0.608716	0.166393	1.35542	0.513242	3.52295	0.646945	0.454473	0.156704	0.292367	0.690457	-1.1535	5.60472	15.2101	1.45447	20.5619	0.460209	0.875423
9-1	0.030773	0.088579	0.02239	0.338035	0.499178	0.216851	0.62435	0.158798	1.37163	0.53729	3.69298	0.677384	0.477371	0.175729	0.302985	0.771034	-1.14413	5.71256	16.5458	1.47737	22.4273	0.484401	0.882978
9-2	0.03158	0.084334	0.022623	0.31164	0.440796	0.228033	0.608072	0.163895	1.39615	0.512231	3.35513	0.645291	0.41452	0.148531	0.272499	0.698634	-1.16986	5.25722	14.0529	1.41452	19.556	0.454291	0.865308
9-3	0.030063	0.074499	0.023371	0.292045	0.423856	0.234961	0.581468	0.183571	1.28785	0.470052	3.38518	0.640242	0.45158	0.155469	0.289317	0.688038	-1.15095	5.75825	14.28	1.45158	18.2341	0.42393	0.866721
10-1	0.028705	0.085932	0.022776	0.35271	0.554409	0.208856	0.624827	0.166318	1.25909	0.537996	4.08499	0.70681	0.574133	0.211742	0.345817	0.843915	-1.10314	6.53075	19.5814	1.57413	24.5361	0.498844	0.901341
10-2	0.031203	0.083626	0.023526	0.322327	0.468091	0.225379	0.603995	0.170626	1.32639	0.505939	3.51235	0.66046	0.45103	0.163288	0.289997	0.73654	-1.14572	5.64893	15.2063	1.45103	20.0228	0.456327	0.873485
10-3	0.033751	0.087302	0.024038	0.305825	0.419747	0.232588	0.601067	0.166345	1.40441	0.501279	3.13167	0.62779	0.373966	0.133602	0.250859	0.667872	-1.18175	4.8496	12.5724	1.37397	17.5888	0.441741	0.850512
11-1	0.026832	0.081078	0.022222	0.354213	0.573104	0.206019	0.622818	0.171163	1.20592	0.534937	4.33073	0.718231	0.619628	0.22722	0.364613	0.870526	-1.08475	7.1451	21.6935	1.61963	26.0198	0.502758	0.91026
11-2	0.03013	0.083427	0.024164	0.349042	0.540558	0.218893	0.605061	0.176046	1.24731	0.507389	3.90221	0.697281	0.54959	0.202784	0.335008	0.826975	-1.11198	6.52815	18.091	1.54959	22.5057	0.468257	0.893807
11-3	0.029983	0.085708	0.023162	0.349406	0.526795	0.215898	0.61676	0.167342	1.29406	0.525676	3.8568	0.691842	0.508394	0.18921	0.31793	0.808644	-1.12173	6.19446	17.7317	1.50839	22.8527	0.481257	0.891825
12-1	0.027411	0.081367	0.023381	0.353188	0.567233	0.207384	0.615215	0.177401	1.17312	0.523335	4.24436	0.714636	0.607604	0.223004	0.359774	0.866207	-1.07437	7.03078	20.9073	1.6076	24.4039	0.495688	0.907597
12-2	0.030569	0.080745	0.02536	0.344003	0.549246	0.223784	0.589813	0.186403	1.2082	0.482713	3.92017	0.700013	0.598315	0.216841	0.352994	0.839392	-1.10539	6.92544	18.2739	1.59831	21.9258	0.448787	0.894111
12-3	0.03164	0.083645	0.025072	0.338066	0.504937	0.225407	0.595545	0.179048	1.26355	0.492402	3.64116	0.677277	0.494239	0.181371	0.310539	0.782653	-1.12739	6.06814	16.0981	1.49424	20.2876	0.450363	0.881274
1-1	0.038457	0.081017	0.031507	0.28314	0.409556	0.254581	0.536812	0.208607	1.22206	0.396971	2.83463	0.610096	0.44718	0.151882	0.282174	0.66054	-1.16409	5.07169	10.715	1.44718	13.0853	0.356434	0.828296
1-2	0.04003	0.083865	0.031276	0.294493	0.418815	0.257855	0.54047	0.201675	1.28096	0.402894	2.8027	0.611598	0.423009	0.147159	0.270889	0.66431	-1.20212	5.01976	10.5322	1.42301	13.4678	0.353593	0.825432
1-3	0.040657	0.087089	0.032134	0.307944	0.441561	0.254338	0.544453	0.201208	1.26618	0.4098	2.87023	0.623752	0.435062	0.154347	0.277273	0.693248	-1.18455	5.09678	10.9229	1.43506	13.8162	0.362958	0.831355
1-4	0.039395	0.08818	0.031795	0.32315	0.475501	0.247536	0.552262	0.200202	1.24266	0.422454	3.06976	0.645159	0.473086	0.170376	0.295711	0.738877	-1.1564	5.44721	12.1567	1.47309	15.0633	0.380413	0.846576
1-5	0.038941	0.087082	0.032994	0.332155	0.50158	0.244761	0.547429	0.20781	1.18039	0.41476	3.20035	0.65954	0.511326	0.185421	0.313342	0.776269	-1.12343	5.7995	12.9956	1.51133	15.2906	0.38184	0.855788
1-6	0.040657	0.091507	0.03407	0.342895	0.510025	0.244607	0.550116	0.205276	1.1937	0.419228	3.14526	0.659361	0.488438	0.180831	0.303418	0.781721	-1.13016	5.60443	12.6391	1.48844	15.0579	0.38417	0.851967
1-7	0.039905	0.094828	0.033464	0.358815	0.538383	0.237312	0.563337	0.199351	1.19241	0.441093	3.28826	0.674019	0.500725	0.189336	0.310173	0.814677	-1.11723	5.70723	13.5798	1.50073	16.165	0.406974	0.861518
1-8	0.036945	0.087677	0.031118	0.359273	0.554898	0.237356	0.562498	0.200146	1.18858	0.439658	3.51123	0.687164	0.544631	0.204181	0.329936	0.836733	-1.11646	6.36743	15.1427	1.54463	17.9477	0.406281	0.874513
1-9	0.035577	0.093898	0.029322	0.384014	0.59801	0.22392	0.591081	0.184999	1.21264	0.485705	3.7608	0.70816	0.558355	0.215859	0.337686	0.882565	-1.10666	6.41644	16.9734	1.55835	20.53	0.450273	0.887614
1-10	0.03131	0.089386	0.02512	0.3766	0.598587	0.214542	0.612572	0.172886	1.24389	0.519249	4.06105	0.71783	0.591707	0.224873	0.35275	0.886842	-1.10617	6.76008	19.3602	1.59171	23.9417	0.481101	0.900689
1-11	0.028853	0.084362	0.024463	0.359281	0.596258	0.209504	0.612375	0.178121	1.17845	0.518993	4.23994	0.72235	0.661003	0.24239	0.379072	0.893859	-1.07836	7.12065	20.8478	1.661	24.481	0.490047	0.907677
1-12	0.028415	0.082972	0.023538	0.34922	0.567387	0.210543	0.614549	0.174908	1.20625	0.522279	4.15633	0.712754	0.625917	0.227826	0.366109	0.862433	-1.08892	6.88967	20.1334	1.62592	24.2037	0.489467	0.904609
1-13	0.02751	0.082115	0.023149	0.342859	0.556617	0.207156	0.618113	0.174731	1.18827	0.527816	4.18499	0.710816	0.62505	0.225434	0.366121	0.854079	-1.07901	6.81911	20.3607	1.62505	24.1413	0.49784	0.905854
1-14	0.029553	0.086983	0.023226	0.343282	0.531302	0.211351	0.621852	0.166796	1.26985	0.533524	3.91605	0.695825	0.549466	0.201119	0.335496	0.817129	-1.10905	6.17102	18.1795	1.54947	22.9839	0.492574	0.894714
2-1	0.026482	0.080229	0.022289	0.33151	0.536918	0.205435	0.620662	0.173903	1.18498	-0.043154	4.19682	0.704443	0.623402	0.220466	0.365328	0.832984	-1.07595	6.77385	20.4824	1.6234	24.1919	0.502411	0.906074
2-2	0.025545	0.077208	0.022192	0.330934	0.551455	0.204349	0.617367	0.178284	1.14856	-0.041444	4.35189	0.71327	0.669085	0.23487	0.382644	0.854125	-1.06322	7.21592	21.8196	1.66908	24.9727	0.502486	0.911595
2-3	0.027563	0.080665	0.021835	0.312343	0.481882	0.212081	0.619336	0.168583	1.26127	-0.042077	3.84105	0.677509	0.544284	0.190107	0.33274	0.764248	-1.10702	6.01691	17.5805	1.54428	22.114	0.489614	0.891521
2-4	0.025106	0.072495	0.021124	0.29666	0.481003	0.211612	0.609918	0.17847	1.18932	-0.037348	4.05119	0.683478	0.622345	0.208856	0.363934	0.772599	-1.08338	6.67599	19.259	1.62234	22.8226	0.484618	0.900507
2-5	0.026256	0.074922	0.02057	0.294721	0.458111	0.215736	0.614891	0.169373	1.27588	-0.038163	3.83582	0.668989	0.554604	0.188026	0.33666	0.737582	-1.11678	6.14489	17.5577	1.5546	22.3157	0.480425	0.891008
2-6	0.027615	0.073134	0.021598	0.28025	0.428417	0.2258	0.597225	0.176975	1.27742	-0.034473	3.57974	0.648968	0.529452	0.175641	0.323842	0.698193	-1.13341	5.88759	15.6543	1.52945	19.9026	0.451093	0.877898
2-7	0.029436	0.07691	0.021845	0.280994	0.414671	0.229695	0.599619	0.170686	1.34736	-0.0357	3.37328	0.636538	0.476842	0.160157	0.300858	0.673609	-1.16045	5.40811	14.1531	1.47684	19.0293	0.445909	0.86691
2-8	0.030956	0.077426	0.022195	0.274327	0.401817	0.23709	0.592775	0.170135	1.39716	-0.034088	3.20941	0.624288	0.464665	0.154787	0.293949	0.651405	-1.19047	5.20682	13.0692	1.46467	18.1769	0.428511	0.856013
2-9	0.03123	0.08113	0.022364	0.284007	0.404681	0.231907	0.601803	0.16629	1.39694	-0.037408	3.20548	0.625363	0.425369	0.145249	0.276569	0.654337	-1.17934	5.00081	13.0357	1.42537	18.155	0.443544	0.855961
2-10	0.032216	0.079394	0.022886	0.281159	0.400626	0.239756	0.589768	0.170476	1.41073	-0.034292	3.12135	0.61981	0.42582	0.144489	0.275618	0.646261	-1.19965	5.06529	12.4854	1.42582	17.5318	0.421803	0.85025
2-11	0.030682	0.078194	0.023223	0.293722	0.439432	0.232629	0.591187	0.176183	1.3219	-0.03524	3.40379	0.647065	0.496624	0.169924	0.309546	0.703464	-1.15969	5.63401	14.3655	1.49662	18.9512	0.434964	0.868684
2-12	0.02939	0.082743	0.02292	0.320796	0.487989	0.21784	0.611968	0.170192	1.28172	-0.041598	3.7208	0.675513	0.521626	0.18563	0.322756	0.766465	-1.12162	5.91729	16.6581	1.52163	21.3023	0.474815	0.885841
2-13	0.026596	0.080578	0.022926	0.345939	0.582193	0.204331	0.618817	0.176851	1.15827	-0.043344	4.38187	0.722471	0.685364	0.245351	0.388484	0.884369	-1.06627	7.28299	22.072	1.68536	25.4817	0.503419	0.912729
2-14	0.029683	0.084535	0.024059	0.349894	0.556906	0.214589	0.610814	0.174597	1.23157	-0.042979	4.00818	0.705238	0.593731	0.217334	0.353116	0.846441	-1.10136	6.63218	18.9141	1.59373	23.2249	0.479895	0.898704
2-15	0.030478	0.089409	0.024896	0.375025	0.612979	0.210383	0.617127	0.17249	1.22256	-0.04674	4.17541	0.724683	0.636393	0.239457	0.37013	0.904383	-1.09344	6.90709	20.2923	1.63639	24.7223	0.491399	0.905367
2-16	0.029259	0.088936	0.024842	0.376675	0.624631	0.204467	0.621111	0.174422	1.17563	-0.047974	4.32139	0.731065	0.661081	0.247873	0.379631	0.921353	-1.07217	7.08729	21.5441	1.66108	25.2359	0.504498	0.910644
2-17	0.029093	0.086127	0.024478	0.36482	0.591342	0.208371	0.615432	0.176197	1.18649	-0.045397	4.1996	0.719626	0.623795	0.231704	0.365635	0.886941	-1.07915	6.93246	20.4991	1.6238	24.2438	0.493864	0.906251
2-18	0.0293	0.08862	0.024226	0.37367	0.611071	0.205849	0.623137	0.171014	1.207	-0.0476	4.26921	0.726725	0.638189	0.239404	0.371252	0.905665	-1.08373	6.95871	21.1025	1.63819	25.3637	0.503227	0.9087
1-1	0.032406	0.078708	0.028537	0.299797	0.502396	0.231908	0.563244	0.204848	1.13612	0.440893	3.58327	0.675741	0.677591	0.226136	0.378988	0.791414	-1.08124	6.43295	15.6393	1.67759	17.7235	0.416417	0.87883
1-2	0.032182	0.077749	0.027854	0.290417	0.473904	0.233589	0.563706	0.202705	1.15919	0.441477	3.4697	0.662324	0.632134	0.209615	0.361979	0.756459	-1.09269	6.14739	14.8241	1.63213	17.13	0.413606	0.872583
1-3	0.031251	0.079709	0.026832	0.307226	0.509033	0.226832	0.577971	0.195198	1.16596	0.464797	3.68729	0.681576	0.658286	0.223289	0.373637	0.797841	-1.09008	6.43112	16.3994	1.65829	19.0762	0.43606	0.884311
1-4	0.031006	0.078108	0.027713	0.307659	0.517516	0.226531	0.570515	0.202953	1.12009	0.452778	3.74441	0.686022	0.683957	0.230939	0.382674	0.812217	-1.06846	6.6796	16.8316	1.68396	18.8048	0.431354	0.887088
1-5	0.031981	0.078683	0.027451	0.297035	0.4892	0.231539	0.569274	0.199187	1.16619	0.450749	3.55354	0.670448	0.648261	0.216563	0.368558	0.773787	-1.09622	6.26838	15.4202	1.64826	17.9393	0.421517	0.877301
1-6	0.029295	0.075998	0.025477	0.298543	0.502832	0.224141	0.580415	0.195444	1.15105	0.468662	3.80716	0.683501	0.686152	0.228104	0.383798	0.794968	-1.08161	6.6835	17.3284	1.68615	19.8694	0.442583	0.889819
2-1	0.036915	0.08781	0.029942	0.306624	0.481712	0.238783	0.567127	0.19409	1.23498	0.447163	3.21926	0.654363	0.571559	0.196981	0.337325	0.750735	-1.13573	5.51824	13.1094	1.57156	16.1759	0.407052	0.857295
2-2	0.034802	0.084392	0.028864	0.307433	0.491763	0.234999	0.569628	0.195373	1.20744	0.451298	3.38673	0.665	0.600738	0.206117	0.350092	0.769054	-1.11897	5.87126	14.2422	1.60074	17.1418	0.415631	0.867795
2-3	0.035196	0.085898	0.029696	0.312433	0.499519	0.233425	0.569285	0.19729	1.18766	0.450735	3.39207	0.667421	0.599512	0.207443	0.349752	0.778916	-1.10728	5.8479	14.2762	1.59951	16.9339	0.418119	0.868169
2-4	0.035976	0.090325	0.029364	0.327467	0.520537	0.231106	0.580002	0.188892	1.22717	0.468093	3.43593	0.675568	0.591019	0.2096	0.347141	0.797959	-1.12135	5.80395	14.5813	1.59102	17.8653	0.429938	0.870752
2-5	0.035824	0.089139	0.029633	0.307947	0.481833	0.231663	0.576455	0.191882	1.20968	0.462485	3.28254	0.657295	0.564988	0.195458	0.335658	0.755081	-1.11604	5.42931	13.5265	1.56499	16.3328	0.426545	0.861483
2-6	0.035611	0.090138	0.027779	0.317779	0.496337	0.232001	0.58673	0.181269	1.28335	0.478859	3.35575	0.665008	0.562135	0.197675	0.335264	0.766073	-1.14434	5.53715	14.0315	1.56214	17.9437	0.433132	0.865869
3-1	0.036798	0.088834	0.030601	0.313306	0.497783	0.235482	0.568431	0.196087	1.20317	0.449469	3.29268	0.662634	0.588877	0.204558	0.344623	0.772701	-1.11904	5.62519	13.6018	1.58888	16.326	0.414007	0.861967
3-2	0.036179	0.089092	0.030499	0.320843	0.509438	0.232286	0.571543	0.196172	1.18718	0.454517	3.37658	0.669935	0.589064	0.206886	0.345779	0.788857	-1.10649	5.75365	14.163	1.58906	16.7892	0.421882	0.867366
3-3	0.03601	0.086952	0.031125	0.320251	0.515944	0.233786	0.563609	0.202605	1.15781	0.441471	3.41181	0.673054	0.612689	0.213871	0.3546	0.799233	-1.09463	5.97535	14.4136	1.61269	16.6546	0.413341	0.869324
3-4	0.034953	0.084953	0.029699	0.319249	0.510748	0.233585	0.567521	0.198893	1.17872	0.447844	3.45463	0.672979	0.600288	0.209908	0.350592	0.792647	-1.10464	6.05089	14.7249	1.60029	17.2971	0.416573	0.871585
3-5	0.035356	0.08752	0.028979	0.312094	0.490257	0.232637	0.576364	0.191	1.2216	0.462248	3.3469	0.66261	0.571389	0.198705	0.338755	0.76469	-1.12178	5.62755	13.9703	1.57139	17.0224	0.424684	0.865344
3-6	0.033647	0.087602	0.02664	0.312354	0.488034	0.227453	0.591953	0.180594	1.26329	0.487137	3.44237	0.665954	0.56371	0.19632	0.336893	0.761516	-1.12892	5.61435	14.6326	1.56371	18.437	0.444668	0.871005
4-1	0.038769	0.092706	0.031622	0.323772	0.506268	0.237796	0.568039	0.194164	1.22879	0.448694	3.22547	0.662259	0.565427	0.20025	0.334943	0.777227	-1.13364	5.50166	13.1555	1.56543	16.1301	0.409575	0.857581
4-2	0.039575	0.095251	0.032964	0.34047	0.535704	0.236064	0.566924	0.197012	1.20303	0.44686	3.29585	0.673562	0.575433	0.208458	0.339479	0.811257	-1.11953	5.6674	13.6256	1.57543	16.34	0.411796	0.862131
4-3	0.03866	0.094147	0.033373	0.348329	0.558396	0.23273	0.566299	0.200971	1.16095	0.445898	3.43018	0.685686	0.604946	0.220562	0.35218	0.842366	-1.09584	5.96995	14.5365	1.60495	16.8618	0.417226	0.870506
4-4	0.037316	0.090116	0.032484	0.344981	0.563011	0.233331	0.563303	0.203366	1.15019	0.44102	3.52152	0.690699	0.633516	0.228738	0.363308	0.850489	-1.09128	6.28395	15.1864	1.63352	17.4489	0.413973	0.875612
4-5	0.038	0.094011	0.029566	0.333412	0.520352	0.235105	0.581636	0.183259	1.28691	0.470735	3.32053	0.670557	0.561534	0.20217	0.334748	0.788744	-1.15085	5.5635	13.7937	1.56153	17.701	0.424148	0.863655
4-6	0.034703	0.088024	0.026681	0.311283	0.483607	0.232263	0.588682	0.179055	1.3002	0.481983	3.35507	0.660949	0.554167	0.19314	0.332408	0.751286	-1.15044	5.52112	14.0234	1.55417	18.1718	0.434035	0.865909
5-1	0.038434	0.092754	0.033104	0.337062	0.539593	0.233957	0.564321	0.201721	1.16421	0.442619	3.3709	0.678069	0.602768	0.216237	0.350637	0.821832	-1.098	5.85086	14.1302	1.60277	16.4288	0.413568	0.866905
5-2	0.03942	0.096814	0.033119	0.352132	0.557351	0.232759	0.571234	0.196007	1.19121	0.453973	3.38873	0.683078	0.584383	0.214958	0.343694	0.836039	-1.11006	5.80681	14.2744	1.58438	16.9288	0.420863	0.867548
5-3	0.040535	0.095813	0.034445	0.348465	0.552974	0.237515	0.560472	0.202013	1.17947	0.436333	3.30882	0.678621	0.588216	0.215166	0.344476	0.83109	-1.11086	5.80599	13.7133	1.58822	16.144	0.404468	0.862935
5-4	0.038207	0.09497	0.033312	0.360492	0.580241	0.229532	0.570061	0.200406	1.14852	0.452092	3.53436	0.694886	0.610803	0.226299	0.355276	0.866666	-1.08648	6.14977	15.2822	1.6108	17.5155	0.425742	0.876249
5-5	0.041469	0.102064	0.033208	0.352487	0.539491	0.234717	0.577191	0.188092	1.25126	0.46352	3.21511	0.67101	0.531426	0.197828	0.321817	0.807383	-1.13783	5.31134	13.0851	1.53143	16.3393	0.421595	0.856936
5-6	0.038447	0.097654	0.030886	0.354884	0.557982	0.230207	0.584698	0.185095	1.24733	0.475536	3.44218	0.68621	0.573698	0.21255	0.340718	0.833301	-1.12839	5.74715	14.633	1.5737	18.2236	0.434774	0.870959
6-1	0.038457	0.091888	0.032018	0.329397	0.519472	0.236954	0.565438	0.197607	1.20334	0.444403	3.28991	0.668603	0.57783	0.206008	0.340236	0.794618	-1.12134	5.68476	13.5925	1.57783	16.3136	0.409093	0.861601
6-2	0.040666	0.096804	0.033314	0.342318	0.530276	0.238275	0.566064	0.195661	1.22111	0.445571	3.22168	0.668521	0.550911	0.201056	0.329264	0.80117	-1.13182	5.52354	13.1333	1.55091	15.9743	0.407397	0.857278
6-3	0.042102	0.098027	0.033548	0.336549	0.509457	0.24261	0.564026	0.193364	1.2577	0.442191	3.06914	0.655209	0.513859	0.187621	0.312833	0.771646	-1.15527	5.22025	12.1503	1.51386	15.2584	0.398264	0.846599
6-4	0.040644	0.097166	0.034128	0.352638	0.550228	0.236612	0.564306	0.199082	1.19229	0.442627	3.29502	0.677122	0.561942	0.207743	0.334433	0.826128	-1.11612	5.70137	13.623	1.56194	16.1971	0.40894	0.861992
6-5	0.041844	0.101697	0.033131	0.354495	0.543459	0.236955	0.575403	0.187641	1.266	0.460639	3.21055	0.671958	0.533882	0.199233	0.322639	0.809788	-1.14742	5.36517	13.0579	1.53388	16.5065	0.416392	0.856572
1-0	0.029891	0.068179	0.023659	0.247847	0.404463	0.245588	0.559227	0.195185	1.27241	0.433749	3.30252	0.62944	0.634948	0.193668	0.359151	0.66545	-1.15985	6.02754	13.7095	1.63495	17.3119	0.388937	0.861756
1-1	0.02964	0.067376	0.024201	0.248278	0.409334	0.24457	0.555237	0.200193	1.23853	0.427025	3.3423	0.633313	0.651077	0.198391	0.36575	0.675016	-1.14114	6.1592	13.9574	1.65108	17.1779	0.387527	0.864671
1-2	0.028672	0.068804	0.02284	0.24667	0.407137	0.238117	0.571345	0.190538	1.27334	0.453193	3.40845	0.634517	0.653542	0.19816	0.3666	0.671758	-1.14002	6.02599	14.4455	1.65354	18.2399	0.410584	0.868043
1-3	0.027668	0.067523	0.021837	0.244476	0.397972	0.236582	0.575428	0.18799	1.27659	0.459997	3.4221	0.631767	0.631239	0.191397	0.359706	0.660858	-1.14078	5.98761	14.4982	1.63124	18.3812	0.416338	0.869675
1-4	0.02524	0.065732	0.019228	0.235896	0.386491	0.229192	0.595336	0.175472	1.32131	0.491859	3.55125	0.631604	0.63994	0.190832	0.365317	0.647906	-1.14493	5.94735	15.3987	1.63994	20.2509	0.443276	0.877258
2-0	0.031483	0.066623	0.026218	0.256434	0.412338	0.253183	0.535756	0.21106	1.20581	0.394908	3.22939	0.630056	0.609625	0.190441	0.350308	0.677426	-1.15115	6.21896	13.1898	1.60963	15.8359	0.357794	0.857644
2-1	0.030632	0.066242	0.025894	0.252391	0.408699	0.249549	0.53918	0.211271	1.18918	0.40065	3.26529	0.630065	0.620649	0.192022	0.354837	0.675485	-1.13207	6.2126	13.4272	1.62065	15.8888	0.366751	0.860027
2-2	0.028486	0.066351	0.023882	0.248391	0.412916	0.239986	0.558176	0.201838	1.20443	0.431797	3.43966	0.638672	0.665497	0.202185	0.371849	0.683834	-1.11766	6.29674	14.6207	1.6655	17.5326	0.397631	0.870697
2-3	0.026691	0.06383	0.022245	0.239777	0.404172	0.236369	0.566311	0.19732	1.21248	0.444939	3.53773	0.638454	0.687838	0.204791	0.381024	0.675012	-1.11604	6.39277	15.3335	1.68784	18.5638	0.409804	0.87592
2-4	0.025559	0.066462	0.019887	0.23347	0.379092	0.228312	0.593976	0.177712	1.29194	0.489992	3.48444	0.625952	0.624365	0.185997	0.35955	0.638844	-1.13842	5.73164	14.9162	1.62437	19.251	0.444188	0.873656
3-1	0.026008	0.067226	0.020622	0.251709	0.406096	0.228525	0.589775	0.1817	1.2641	0.483518	3.59331	0.641338	0.614472	0.190286	0.357192	0.674601	-1.13023	6.07889	15.7095	1.61447	19.7908	0.44115	0.879409
3-2	0.027618	0.071113	0.021741	0.265654	0.427777	0.229351	0.589715	0.180933	1.27161	0.483521	3.5741	0.649387	0.611357	0.194559	0.35581	0.698523	-1.13512	6.04604	15.5677	1.61136	19.7425	0.439734	0.87842
3-3	0.028621	0.074044	0.022466	0.276925	0.44229	0.228911	0.590958	0.180131	1.27596	0.485482	3.56878	0.654897	0.5983	0.194893	0.351064	0.714633	-1.13545	6.00708	15.5247	1.5983	19.7527	0.441369	0.878208
3-4	0.0303	0.075959	0.023614	0.282959	0.453813	0.233199	0.584265	0.182536	1.28489	0.474701	3.50849	0.656467	0.605033	0.198892	0.352786	0.72481	-1.14628	6.00755	15.1118	1.60503	19.3271	0.429149	0.87453
3-5	0.031148	0.080127	0.024252	0.301644	0.485083	0.229984	0.590522	0.179495	1.28632	0.484778	3.58567	0.670493	0.609731	0.206738	0.355315	0.760703	-1.14121	6.0853	15.6469	1.60973	20.0607	0.439186	0.879123
3-6	0.032182	0.085353	0.024899	0.321221	0.50955	0.225844	0.598984	0.175172	1.29405	0.498146	3.62515	0.679605	0.587591	0.206524	0.347529	0.786381	-1.13622	5.99873	15.9409	1.58759	20.5908	0.452185	0.88108
4-1	0.024833	0.064401	0.019336	0.24116	0.390116	0.228781	0.592725	0.178494	1.28644	0.488283	3.60466	0.634725	0.618279	0.187366	0.358718	0.65455	-1.13877	6.08677	15.7909	1.61828	20.2584	0.442796	0.88004
4-2	0.026563	0.068054	0.021265	0.256525	0.415669	0.229247	0.586831	0.183922	1.25284	0.478932	3.59826	0.645267	0.621309	0.193938	0.359596	0.686348	-1.12684	6.14837	15.7406	1.62131	19.6561	0.437932	0.879752
4-3	0.026453	0.067471	0.021619	0.261995	0.431417	0.228952	0.583613	0.187435	1.23005	0.473703	3.68847	0.654635	0.647948	0.203338	0.369888	0.70822	-1.11737	6.42807	16.4132	1.64795	20.1165	0.436163	0.884278
4-4	0.02752	0.066259	0.023185	0.267144	0.45036	0.235362	0.565871	0.198766	1.19065	0.44509	3.69649	0.662129	0.687536	0.216212	0.383379	0.732512	-1.11145	6.84226	16.4746	1.68754	19.5313	0.412206	0.884663
4-5	0.031244	0.077388	0.023955	0.292811	0.474196	0.235566	0.583126	0.181308	1.3057	0.472941	3.53693	0.663868	0.620678	0.206748	0.358293	0.745354	-1.15952	6.16127	15.3375	1.62068	19.8763	0.424318	0.875697
4-6	0.032421	0.080391	0.024995	0.305166	0.493265	0.235384	0.583004	0.181612	1.30138	0.472832	3.54007	0.670705	0.617581	0.210232	0.357426	0.766355	-1.15695	6.1716	15.3423	1.61758	19.8728	0.424584	0.876217

## Sheet: Aoping
	Red	Green	Blue	Rededge	NIR	r	g	b	RBRI	VDVI	MSRI	OSAVI	RECI	RERDVI	LCI	EVI	WI	GRVI	RVI	RERVI	BRVI	NGRVI
region	b1	b2	b3	b4	b5	b1/(b1+b2+b3)	b2/(b1+b2+b3)	b3/(b1+b2+b3)	b1/b3	(2*b2-b1-b3)/(b1+2*b2+b3)	(b5/b1-1)/sqrt(b5/b1+1)	(b5-b1)/(b5+b1+0.16)	b5/b4-1	(b5-b4)/sqrt(b5+b4)	(b5-b4)/(b5+b1)	2.5*[(b5-b1)/(b5+6*b1-7.5*b3+1)]	(b2-b3)/(b1-b2)	b5/b2	b5/b1	b5/b4	b5/b3	(b2-b1)/(b1+b2)
a1-1	0.02234	0.055002	0.019314	0.225488	0.41013	0.231077	0.56879	0.200133	1.15709	0.450114	3.9522	0.654372	0.81999	0.231621	0.427097	0.692651	-1.09143	7.48644	18.4357	1.81999	21.2957	0.422094
a1-2	0.022488	0.058132	0.019642	0.238101	0.421369	0.224208	0.579525	0.196267	1.1446	0.467454	3.99917	0.6601	0.770833	0.225645	0.413019	0.707251	-1.07861	7.27348	18.8183	1.77083	21.5014	0.441981
a1-3	0.025301	0.064384	0.021255	0.264508	0.474985	0.227826	0.580344	0.191829	1.18982	0.468786	4.00928	0.680871	0.797349	0.244784	0.420841	0.765898	-1.1025	7.41138	18.9103	1.79735	22.4353	0.436128
a2-1	0.02481	0.057401	0.020329	0.212634	0.38029	0.241747	0.559707	0.198546	1.2197	0.435302	3.55428	0.628868	0.790511	0.217794	0.414106	0.645346	-1.13649	6.64718	15.4127	1.79051	18.7501	0.396672
a2-2	0.025782	0.056391	0.020441	0.199206	0.354182	0.251121	0.549409	0.19947	1.26133	0.418284	3.32355	0.607991	0.779509	0.208363	0.408023	0.605502	-1.17403	6.29755	13.7928	1.77951	17.3532	0.372586
a2-3	0.025996	0.056999	0.02105	0.200479	0.354548	0.249571	0.547913	0.202516	1.23464	0.415765	3.31294	0.607457	0.769284	0.206759	0.404812	0.607	-1.15909	6.24136	13.7413	1.76928	16.9027	0.37408
a3-1	0.039854	0.068823	0.024316	0.217286	0.340709	0.298807	0.517864	0.183328	1.63565	0.364503	2.46066	0.55604	0.568415	0.165108	0.324089	0.538124	-1.55203	4.97203	8.69249	1.56841	14.0477	0.268426
a3-2	0.04012	0.077474	0.025965	0.251003	0.410037	0.278655	0.5401	0.181245	1.54231	0.402618	2.77062	0.605949	0.634608	0.195564	0.353328	0.635031	-1.38247	5.31692	10.3706	1.63461	15.8531	0.31944
a3-3	0.033867	0.069867	0.024205	0.240016	0.401458	0.263959	0.546245	0.189796	1.39692	0.412965	3.04646	0.616994	0.673495	0.201478	0.370729	0.645528	-1.26877	5.77981	12.0314	1.67349	16.6372	0.348535
a4-1	0.027004	0.066488	0.021339	0.258862	0.438218	0.234733	0.579207	0.18606	1.26422	0.466984	3.68385	0.657458	0.693575	0.214775	0.385437	0.71362	-1.14323	6.61657	16.3911	1.69358	20.6178	0.423239
a4-2	0.027065	0.065464	0.021195	0.252051	0.444267	0.237627	0.575663	0.18671	1.27602	0.461287	3.70904	0.660549	0.764275	0.230375	0.408022	0.720162	-1.15201	6.82075	16.5756	1.76428	21.0443	0.415655
a4-3	0.028857	0.065903	0.021841	0.24097	0.41104	0.247172	0.565233	0.187595	1.3201	0.444377	3.40327	0.636799	0.70728	0.210641	0.386765	0.672418	-1.18879	6.26078	14.3556	1.70728	18.8764	0.391504
b1-1	0.025707	0.065818	0.022023	0.285908	0.498767	0.226193	0.579562	0.194245	1.16661	0.467541	4.08507	0.690457	0.745456	0.240154	0.405761	0.793986	-1.09068	7.61241	19.5335	1.74546	22.7316	0.438498
b1-2	0.026408	0.065283	0.022158	0.279517	0.51031	0.23179	0.573056	0.195154	1.1906	0.457014	4.07534	0.694085	0.828965	0.259777	0.430441	0.804448	-1.10794	7.85294	19.4468	1.82896	23.079	0.423923
b1-3	0.025001	0.061273	0.020776	0.25647	0.454667	0.233377	0.571997	0.194626	1.20238	0.455285	3.93747	0.671332	0.775626	0.235098	0.413588	0.740881	-1.11478	7.47292	18.3328	1.77563	21.967	0.420336
b2-1	0.024619	0.062458	0.021365	0.286121	0.520483	0.226794	0.575642	0.197564	1.15075	0.460975	4.30146	0.702649	0.821167	0.260913	0.430134	0.821253	-1.08483	8.40549	21.4027	1.82117	24.5235	0.43445
b2-2	0.02633	0.062908	0.021912	0.270913	0.473625	0.236357	0.56592	0.197722	1.19921	0.445285	3.93045	0.677012	0.751059	0.234829	0.405353	0.761234	-1.1185	7.63188	18.3506	1.75106	21.8739	0.410586
b2-3	0.031078	0.062364	0.022328	0.232373	0.363514	0.267273	0.53962	0.193108	1.38993	0.401469	3.03212	0.598936	0.565238	0.169777	0.332048	0.600847	-1.28224	5.87768	11.9731	1.56524	16.5004	0.337306
b3-1	0.032941	0.072564	0.025633	0.261873	0.459408	0.251013	0.553398	0.195588	1.285	0.424853	3.3562	0.653645	0.755576	0.232594	0.401147	0.727754	-1.18461	6.3506	14.0187	1.75558	17.9755	0.375823
b3-2	0.031005	0.072023	0.025596	0.279254	0.509085	0.24076	0.559923	0.199317	1.21012	0.435557	3.70994	0.682677	0.825896	0.25894	0.425866	0.794776	-1.13141	7.11123	16.5766	1.8259	19.9963	0.398493
b3-3	0.035297	0.075688	0.029625	0.283539	0.504291	0.250779	0.538355	0.210866	1.19112	0.399536	3.41154	0.670098	0.781192	0.248767	0.409373	0.784413	-1.14071	6.70015	14.4151	1.78119	17.1335	0.364217
b4-1	0.029796	0.066553	0.023938	0.25804	0.43926	0.24711	0.553587	0.199303	1.24202	0.425087	3.48407	0.650187	0.70385	0.216984	0.386469	0.710984	-1.16103	6.63261	14.9678	1.70385	18.4514	0.38274
b4-2	0.031425	0.06762	0.024109	0.239164	0.397899	0.255018	0.548821	0.196161	1.30239	0.41718	3.16528	0.620472	0.664657	0.198648	0.369436	0.650722	-1.20583	5.90867	12.7839	1.66466	16.5503	0.365476
b4-3	0.033555	0.064399	0.024163	0.216432	0.352588	0.274071	0.527491	0.198438	1.38532	0.380994	2.81953	0.582223	0.630946	0.180233	0.352307	0.579789	-1.3186	5.5016	10.6836	1.63095	14.6429	0.316193
